# Supplementary material for: Health and financial burden of adverse childhood experiences in England and Wales: a combined primary data study of five surveys
Source: PubMed Central journal article supplement — BMJ Open. 2020 Jun 7;10(6):e036374. doi: 10.1136/bmjopen-2019-036374 (PMC7282338; doi:10.1136/bmjopen-2019-036374), 2020-06-07
Supplement: bmjopen-2019-036374.draft_revisions.pdf [file bmjopen-2019-036374.draft_revisions.pdf]

# BMJ Open

BMJ Open is committed to open peer review. As part of this commitment we make the peer review history of every article we publish publicly available.

When an article is published we post the peer reviewers' comments and the authors' responses online. We also post the versions of the paper that were used during peer review. These are the versions that the peer review comments apply to.

The versions of the paper that follow are the versions that were submitted during the peer review process. They are not the versions of record or the final published versions. They should not be cited or distributed as the published version of this manuscript.

BMJ Open is an open access journal and the full, final, typeset and author-corrected version of record of the manuscript is available on our site with no access controls, subscription charges or pay-per-view fees (<http://bmjopen.bmj.com>).

If you have any questions on BMJ Open's open peer review process please email [info.bmjopen@bmj.com](mailto:info.bmjopen@bmj.com)

# BMJ Open

## The health and financial burden of Adverse Childhood Experiences in England and Wales: a combined primary data study of five surveys

|                               |                                                                                                                                                                                                                                                                                                                                                                                                                            |
|-------------------------------|----------------------------------------------------------------------------------------------------------------------------------------------------------------------------------------------------------------------------------------------------------------------------------------------------------------------------------------------------------------------------------------------------------------------------|
| Journal:                      | <i>BMJ Open</i>                                                                                                                                                                                                                                                                                                                                                                                                            |
| Manuscript ID                 | bmjopen-2019-036374                                                                                                                                                                                                                                                                                                                                                                                                        |
| Article Type:                 | Original research                                                                                                                                                                                                                                                                                                                                                                                                          |
| Date Submitted by the Author: | 12-Dec-2019                                                                                                                                                                                                                                                                                                                                                                                                                |
| Complete List of Authors:     | Hughes, Karen; Public Health Wales, Policy and International Health; Bangor University, School of Health Sciences<br>Ford, Kat; Bangor University, College of Health and Behavioural Sciences<br>Kadel, Rajendra; Public Health Wales, Policy and International Health<br>Bellis, Mark; Bangor University, College of Health and Behavioural Sciences; Public Health Wales, Policy, Research and International Development |
| Keywords:                     | PUBLIC HEALTH, HEALTH ECONOMICS, EPIDEMIOLOGY                                                                                                                                                                                                                                                                                                                                                                              |
|                               |                                                                                                                                                                                                                                                                                                                                                                                                                            |

SCHOLARONE™  
Manuscripts

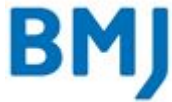

I, the Submitting Author has the right to grant and does grant on behalf of all authors of the Work (as defined in the below author licence), an exclusive licence and/or a non-exclusive licence for contributions from authors who are: i) UK Crown employees; ii) where BMJ has agreed a CC-BY licence shall apply, and/or iii) in accordance with the terms applicable for US Federal Government officers or employees acting as part of their official duties; on a worldwide, perpetual, irrevocable, royalty-free basis to BMJ Publishing Group Ltd ("BMJ") its licensees and where the relevant Journal is co-owned by BMJ to the co-owners of the Journal, to publish the Work in this journal and any other BMJ products and to exploit all rights, as set out in our [licence](#).

The Submitting Author accepts and understands that any supply made under these terms is made by BMJ to the Submitting Author unless you are acting as an employee on behalf of your employer or a postgraduate student of an affiliated institution which is paying any applicable article publishing charge ("APC") for Open Access articles. Where the Submitting Author wishes to make the Work available on an Open Access basis (and intends to pay the relevant APC), the terms of reuse of such Open Access shall be governed by a Creative Commons licence – details of these licences and which [Creative Commons](#) licence will apply to this Work are set out in our licence referred to above.

Other than as permitted in any relevant BMJ Author's Self Archiving Policies, I confirm this Work has not been accepted for publication elsewhere, is not being considered for publication elsewhere and does not duplicate material already published. I confirm all authors consent to publication of this Work and authorise the granting of this licence.

|                      |                                                                                                                                                                                                                                                                                                                                                                                                                                                                                                                                                                                                                                                                                                                           |
|----------------------|---------------------------------------------------------------------------------------------------------------------------------------------------------------------------------------------------------------------------------------------------------------------------------------------------------------------------------------------------------------------------------------------------------------------------------------------------------------------------------------------------------------------------------------------------------------------------------------------------------------------------------------------------------------------------------------------------------------------------|
| Title                | The health and financial burden of Adverse Childhood Experiences in England and Wales: a combined primary data study of five surveys                                                                                                                                                                                                                                                                                                                                                                                                                                                                                                                                                                                      |
| Authors              | Karen Hughes <sup>1,2</sup> (0000-0001-8097-3395), Kat Ford <sup>2</sup> (0000-0002-2984-5838), Rajendra Kadel <sup>1</sup> (0000-0002-2547-6342), Mark A Bellis <sup>1,2</sup> (0000-0001-6980-1963)                                                                                                                                                                                                                                                                                                                                                                                                                                                                                                                     |
| Addresses            | <p><sup>1</sup>World Health Organization Collaborating Centre on Investment for Health and Well-being, Policy and International Health, Public Health Wales, Wrexham, LL13 7YP, UK</p> <p>Karen Hughes, <a href="mailto:karen.hughes18@wales.nhs.uk">karen.hughes18@wales.nhs.uk</a></p> <p>Rajendra Kadel, <a href="mailto:Rajendra.Kadel@wales.nhs.uk">Rajendra.Kadel@wales.nhs.uk</a></p> <p>Mark A Bellis, <a href="mailto:m.a.bellis@bangor.ac.uk">m.a.bellis@bangor.ac.uk</a></p> <p><sup>2</sup>Public Health Collaborating Unit, School of Health Sciences, College of Human Sciences, Bangor University, Wrexham, LL13 7YP, UK</p> <p>Kat Ford, <a href="mailto:k.ford@bangor.ac.uk">k.ford@bangor.ac.uk</a></p> |
| Corresponding author | Correspondence to: Karen Hughes, World Health Organization Collaborating Centre on Investment for Health and Well-being, Policy and International Health, Public Health Wales, Wrexham, UK, LL13 7YP<br><a href="mailto:karen.hughes18@wales.nhs.uk">karen.hughes18@wales.nhs.uk</a>                                                                                                                                                                                                                                                                                                                                                                                                                                      |
| Word count           | 3,280                                                                                                                                                                                                                                                                                                                                                                                                                                                                                                                                                                                                                                                                                                                     |

## Abstract

**Objectives:** To estimate the health and financial burden of adverse childhood experiences (ACEs) in England and Wales.

**Design:** Combined data from five randomly stratified cross-sectional ACE studies. Calculated population attributable fractions (PAFs) for major health risks and causes of ill-health applied to Disability Adjusted Life Years (DALYs) with financial costs estimated using a human capital method.

**Setting:** Households in England and Wales.

**Participants:** 15,285 residents aged 18-69.

**Outcome measures:** PAFs for single and multiple ACE exposure categories for four risk factors (smoking, binge drinking, cannabis use, overweight) and nine causes of ill-health (cancer, type 2 diabetes, heart disease, respiratory disease, stroke, violence victimisation, anxiety, depression, other mental illness). Annual estimated DALYs and financial costs attributable to ACEs.

**Results:** Cumulative relationships were found between ACEs and risks of all outcomes. For risk factors, PAFs for ACEs were highest for cannabis use (Wales 36.5%, England 33.0%) although ACE-attributable smoking accounted for the highest estimated annual costs (£7.8 billion across England and Wales). For causes of ill-health, PAFs for ACEs were highest for violence (Wales 49.3%, England 43.6%) and mental illness (ranging from 29.2% for anxiety in England to 51.0% for other mental illness in Wales). The greatest ACE-attributable costs were for mental illness (anxiety, depression and other mental illness combined; £11.4 billion across England and Wales) and cancer (£8.3 billion). Across all conditions, total annual ACE-attributable costs were estimated at £45.0 billion (1.6 million DALYs). The majority of costs related to exposures to multiple rather than a single ACE (ranging from 70.4% for overweight to 96.1% for cancer).

**Conclusions:** ACEs impose a substantial societal burden in England and Wales. Policies and practices that prevent ACEs, build resilience and develop trauma-informed services are needed to reduce burden of disease and avoidable service use and financial costs across health and other sectors.

## Article Summary

### Strengths and limitations of this study

- Adverse childhood experiences are known to increase individuals' risks of poor health across the life course yet the financial burden they imposes on national economies is largely unmeasured.
- We combined primary data on ACEs and 13 health outcomes from five general population ACE surveys undertaken in England and Wales.
- For each outcome, we generated population attributable fractions for cumulative ACE exposure and applied these to Disability Adjusted Life Years which, in turn, allowed calculation of financial burden of ACEs using a human capital approach.
- ACE data were retrospectively reported and may be affected by recall bias, while general household surveys by their nature are likely to exclude those that have suffered the greatest impact of ACEs (e.g. premature death, incarceration or homelessness)
- Although most major health outcomes were included in the study, data are not yet available on all health outcomes potentially associated with ACEs and financial estimates are likely to be conservative.

## Introduction

Evidence linking adverse childhood experiences (ACEs) to the adoption of health-harming behaviours and the development of mental and physical illness has burgeoned in recent years.<sup>1</sup> The term ACEs is used to describe some of the most intense sources of stress that children can suffer whilst growing up, such as being maltreated, witnessing domestic violence or coping with parental substance abuse.<sup>2</sup> Such experiences can have harmful effects on children's developing neurological and physiological systems that can embed vulnerability to poor health and well-being. Thus repeated activation of the stress response system during childhood and a lack of responsive interaction with caring adults can impact on brain structure, neuroendocrine stress regulation, immune functioning and metabolic health, as well as social and emotional development.<sup>3,4</sup> Consistent with such effects, ACEs have been associated with delayed child development (e.g. cognitive and language skills), childhood health and behavioural conditions, the adoption of health-risk behaviours (e.g. substance use), mental illness, and early development of chronic health conditions (e.g. cancer).<sup>1,5-8</sup>

Numerous studies have explored the health impacts and costs of specific ACEs such as child maltreatment.<sup>9-11</sup> However, the ACE framework provides a mechanism for measuring a range of ACE types and the cumulative risks they impose at a population level.<sup>2</sup> Studies using this approach show a dose response relationship between the number of ACEs suffered and poor outcomes across multiple domains, including health, criminal justice, education and employment.<sup>12-15</sup> Studies also show that most individuals who report having suffered any specific ACE type (e.g. physical abuse) report other ACE types (e.g. exposure to domestic violence).<sup>16</sup> Consequently, prevention efforts focused on any individual ACE type are likely to have limited success if the range of other ACEs affecting families are left unaddressed. The rapid proliferation of awareness on the impacts of ACEs on the policy priorities of different sectors is driving multi-agency action to enhance early intervention and develop trauma-informed services.<sup>17,18</sup> However, such policy development requires an understanding of the financial costs of ACEs to society and consequently the potential gains to be made by preventing ACEs for future generations.

Estimates of the financial burden of ACEs are only just starting to emerge. A recent study estimated that the annual costs attributable to ACEs for four risk factors (smoking, harmful alcohol use, illicit drug use and obesity) and six causes of ill-health (anxiety, depression, cancer, type 2 diabetes, cardiovascular disease and stroke) reached \$581 billion in Europe

1  
2  
3 and \$748 billion in North America; equivalent to around 3% of each regions' GDP.<sup>12</sup> Here,  
4 we combine primary data from five ACE studies undertaken in England and Wales to  
5 develop national population attributable fractions (PAFs) for ACEs across an extended range  
6 of outcomes. We use these data to estimate the annual cost of the health burden resulting  
7 from the life-long impact of ACEs on residents of England and Wales using a human capital  
8 model.  
9  
10  
11  
12  
13  
14

## 15 **Methods**

### 16 **Primary data sources**

17  
18 We combined data from five cross-sectional ACE studies conducted across various  
19 geographies in England and Wales between 2012 and 2017.<sup>19-23</sup> Summary information on  
20 each study is provided in online supplementary table S1. All studies used stratified random  
21 sampling approaches with lower super output area (LSOA; small geographical areas with a  
22 mean population of 1,500) as the sampling unit. LSOAs were categorised into deprivation  
23 quintiles based on their ranking in the English<sup>24</sup> or Welsh<sup>25</sup> Indexes of Multiple Deprivation  
24 (IMD); both of which are composite measures including a range of economic and social  
25 indicators. Sample selection was stratified by region (as appropriate, see online  
26 supplementary table S1) then deprivation quintile based on the population profile of the  
27 relevant study area. Households in sampled areas were identified using the national postcode  
28 address file. In four studies, randomly selected households were sent a letter prior to  
29 researcher visits that provided information on the study and the opportunity to opt out. In one  
30 study,<sup>22</sup> researchers randomly selected households in sampled LSOAs and provided study  
31 information materials at the door. Interviews were undertaken face-to-face at participants'  
32 homes by professional market research companies using computer assisted personal  
33 interviewing. Informed consent was obtained from all participants. Sensitive questions,  
34 including those on ACEs, were self-completed. Participation was voluntary and anonymous  
35 and only one resident participated per selected household (inclusion criteria: within age  
36 range, resident in the LSOA, cognitively able to participate in a face-to-face interview).  
37  
38 Across the five samples, weighted average compliance was 55.7% (see online supplementary  
39 table S1) with a total sample size of 15,658. For this study, data were restricted to individuals  
40 aged 18-69 with complete demographic and ACE data, resulting in a final sample of 15,285.  
41  
42  
43  
44  
45  
46  
47  
48  
49  
50  
51  
52  
53  
54  
55  
56  
57  
58  
59  
60



All questionnaires used the Centers for Disease Control and Prevention short ACE tool<sup>26</sup> to collect data on nine ACEs occurring before the age of 18: physical abuse; sexual abuse; verbal abuse; parental separation; exposure to domestic violence; and household member alcohol abuse; drug abuse; mental illness; and incarceration. For the purpose of analysis, positive responses to ACE questions were summed and participants were allocated to an ACE count category: 0 ACEs, 1 ACE, 2-3 ACEs,  $\geq 4$  ACEs. Questions used to determine ACEs and the thirteen health outcomes analysed in this study are shown in online supplementary table S2. All studies provided data on current smoking, lifetime cannabis use and violence victimisation in the past 12 months; four provided data on current binge drinking, overweight, and lifetime diagnosis of cancer, type 2 diabetes, heart disease, stroke and respiratory disease; and one provided data on lifetime treatment for depression, anxiety and other mental illness (see online supplementary table S3). Demographic variables included gender, age, ethnicity (self-assigned using UK census categories) and deprivation quintile.

### Calculating PAFs

Statistical analysis was undertaken in SPSS v23 with data editing and calculations undertaken in Excel. Binomial generalized linear modelling was used to calculate risk ratios (RRs) and 95% confidence intervals (CIs) associated with ACE count level for each health outcome, controlling for study location, gender, ethnicity (white or non-white) and deprivation quintile of residence. Binomial regression did not converge in a model for smoking and consequently for this outcome we calculated hazard ratios using cox regression with a constant in the time variable.<sup>27</sup> In line with cost estimates for global regions,<sup>12</sup> we calculated PAFs for each ACE count level according to:

$$PAF_{ACE\alpha} = \frac{P_{ACE\alpha} \times (RR_{ACE\alpha} - 1)}{(P_{ACE0}) + (P_{ACE1} \times RR_{ACE1}) + (P_{ACE2-3} \times RR_{ACE2-3}) + (P_{ACE4+} \times RR_{ACE4+})}$$

where  $\alpha$  is the category of ACE count for the PAF in question,  $RR_{ACE}$  is the pooled RR associated with each ACE count and  $P_{ACE}$  is the proportion of the sample exposed to each ACE count. Separate PAFs were generated for England and Wales using regional ACE prevalence levels.

### Calculating ACE-attributable costs

1  
2  
3 Consistent with previous studies,<sup>11,12,28</sup> we used a human capital approach to calculate ACE-  
4 attributable costs associated with each health outcome. The human capital approach is a  
5 commonly used method in economic evaluations to calculate the cost of lost productivity to  
6 society as a result of separation of an individual from the labour force due to premature death  
7 or morbidity.<sup>29</sup> Health outcomes were matched to risk factor and cause categories in the 2017  
8 Global Burden of Disease Study<sup>30</sup> (GBD; see online supplementary table S4). For each  
9 matched category, disability adjusted life years (DALY) estimates were extracted for England  
10 and Wales for age categories 15-49 years, 50-69 years and 70+ years. Previous cost estimates  
11 using a human capital approach have assumed one DALY is equal to a regions' GDP per  
12 capita and calculated costs based on DALYs\*GDP per capita.<sup>11,12,28</sup> GDP is not calculated  
13 separately for England and Wales, thus we used the related measure of regional Gross Value  
14 Added (GVA; equivalent to GDP plus subsidies less taxes on products) with GVA per capita  
15 (balanced, current basic 2017 prices) being £28,096 for England and £19,899 for Wales.<sup>31</sup>  
16 PAFs were applied to the total cost (by UK region) for each risk factor and cause to estimate  
17 the economic value of DALYs lost by ACE level. The equivalent value of DALYs lost as a  
18 proportion of total GVA was also calculated. To estimate the total costs attributed to ACEs  
19 across all health outcomes studied, we excluded DALYs for risk factors that related to  
20 included causes of ill health (e.g. those for alcohol use attributed to cancer). Sensitivity  
21 analyses were run limiting DALYs to those for 15-69 year olds; using the upper and lower  
22 bounds (uncertainty intervals) for DALYs (extracted from the GBD); and by generating PAFs  
23 using the upper and lower confidence intervals for RRs.

### 41 **Patient and Public Involvement**

42 There was no patient involvement in this study. Public participants in all five contributing  
43 studies were provided with an information sheet with the contact details of the relevant  
44 research team if they wanted to request copies of study publications (reports and open access  
45 journal papers). All study findings are publicly available.

### 51 **Results**

52 Demographics and ACE count levels of the individual and combined study samples are  
53 shown in online supplementary table S5. Across the combined samples, over half (54.9%) of  
54 participants were female and 85.7% were of white ethnicity. ACE prevalence levels (used to  
55 generate PAFs) were 53.1% 0 ACEs, 19.0% 1 ACE, 15.2% 2-3 ACEs and 12.6%  $\geq 4$  ACEs in  
56  
57  
58  
59  
60

1  
2  
3 Welsh samples, and 56.2% 0 ACEs, 20.1% 1 ACE, 15.4% 2-3 ACEs and 8.4%  $\geq 4$  ACEs in  
4 English samples.  
5  
6  
7

8 RRs for each ACE count level and each health outcome are presented in table 1 (unadjusted  
9 proportions are provided in online supplementary table S6). All outcomes showed a graded  
10 relationship with ACEs, with RRs increasing as ACE count increased. Risks of binge  
11 drinking, smoking, cannabis use, being a victim of violence and mental illness outcomes were  
12 increased in individuals with any level of ACEs. Risks of being overweight, type 2 diabetes,  
13 heart disease and respiratory disease were increased in individuals with  $\geq 2$  ACEs, and risks  
14 of cancer and stroke in those with  $\geq 4$  ACEs only.  
15  
16  
17  
18  
19  
20  
21

22 Total PAFs for ACEs were slightly higher in Wales than in England for all outcomes due to  
23 higher ACE prevalence levels (table 2). Across the four risk factors, cannabis use had the  
24 highest PAFs due to ACEs (36.5% Wales, 33.0% England). However, smoking carried the  
25 highest ACE-attributable costs given higher numbers of DALYs for this risk factor. ACE-  
26 attributable costs due to smoking were £7.3 billion in England and £465.0 million in Wales.  
27 Being overweight had the lowest PAFs due to ACEs (2.3% Wales, 2.0% England), although  
28 ACE-attributable costs still reached £692.9 million in England and £33.1 million in Wales.  
29 Across causes of ill-health, violence and mental illness had the highest PAFs due to ACEs  
30 while cancer and type 2 diabetes had the lowest. ACEs were attributed to 49.3% of recent  
31 violence victimisation in Wales and 43.6% in England, with associated costs of £16.7 million  
32 and £357.2 million respectively. Up to a third of depression and anxiety, and half of other  
33 mental illnesses, were attributed to ACEs with associated costs across the three mental health  
34 outcomes being £473.6 million in Wales and almost £11 billion in England. Despite having  
35 low PAFs, high DALYs for cancer meant that this cause carried the greatest ACE-attributable  
36 costs across all individual outcomes measured; reaching £491.2 million in Wales and £7.9  
37 billion in England.  
38  
39  
40  
41  
42  
43  
44  
45  
46  
47  
48  
49  
50

51 Figure 1 shows the proportion of ACE-attributable costs for each outcome that were  
52 accounted for by 1, 2-3 and  $\geq 4$  ACEs. For cancer, the 1 ACE category accounted for only  
53 3.9% of ACE-attributable financial costs while the  $\geq 4$  ACEs category accounted for 78.5%.  
54 For other outcomes, the 1 ACE category accounted for between 9.5% (violence) and 29.6%  
55 (overweight) of costs and the  $\geq 4$  ACEs for between 26.1% (overweight) and 52.5% (stroke).  
56  
57  
58  
59  
60

To calculate a total ACE-attributable cost across all risk factors and causes of ill-health, we excluded DALYs from the four risk factors that related to included causes (e.g. those for smoking related to cancer). Total ACE-attributable costs across all included outcomes and both geographies were £45.0 billion (£2.3 billion for Wales and £42.7 billion for England; table 3). These costs are equivalent to 3.7% of total annual GVA in Wales and 2.7% in England (2.8% across the combined geographies). In sensitivity analysis (see methods) combined estimated ACE-attributable costs for England and Wales ranged from £17.2 billion (equivalent to 1.1% of GVA) to £72.0 billion (4.4% of GVA; table 3).

## Discussion

In this study of 15,285 adults in England and Wales, we found a dose-response relationship between ACEs and all outcomes measured. Violence, mental illness and cannabis use had the highest PAFs due to ACEs, while mental illness, cancer and smoking carried the highest ACE-attributable costs. Across all outcomes studied, the total estimated annual ACE-attributable costs across England and Wales were £45.0 billion, equivalent to more than £1,800 per household per annum.<sup>32</sup> The majority of these costs related to multiple ACE categories.

## Comparison with other studies

There are no previous studies estimating the costs of ACEs in England and Wales. However, regionally the annual costs of ACEs have been estimated to be equivalent to 2.7% of GDP in Europe and 3.6% of GDP in North America; comparable to our estimate of 2.8% of GVA in England and Wales.<sup>12</sup> Other studies have measured the costs of specific ACEs, particularly violence against children. Such costs have been estimated to be equivalent to between 1.2% and 3.5% of sub-regional GDP in East Asia and the Pacific;<sup>11</sup> to 4.3% of GDP in South Africa;<sup>33</sup> and to 0.8% of GDP for physical abuse, 0.5% for emotional abuse and 0.4% for sexual abuse in China.<sup>34</sup> In the UK, the lifetime cost per victim of non-fatal child maltreatment by a primary caregiver has conservatively been estimated at £90,000.<sup>35</sup> However, this estimate excluded costs for several outcomes considered in our study, including those for cancer, type 2 diabetes and heart disease, due to no association being found between these conditions and the study's single measure of child maltreatment. We found no associations between such conditions and the single ACE category, yet strong associations with multiple ACEs. Thus 96.1% of the ACE-attributable costs of cancer, 88.4%

1  
2  
3 of those for heart disease and 76.3% of those for type 2 diabetes were accounted for by  
4 suffering more than one type of ACE.  
5  
6  
7

### 8 **Strengths and weaknesses of the study**

9  
10 We used an established human capital methodology<sup>11,12,28</sup> and based our approach on that  
11 used to estimate the financial burden of ACEs across Europe and North America.<sup>12</sup> This  
12 previous study generated PAFs through meta-analyses of risk estimates in published literature  
13 and acknowledged the lack of consistency in study methodologies as a limitation. Key  
14 strengths of the current study are the use of primary data and consistency in study  
15 methodologies, with all studies using representative household samples and the same set of  
16 questions to measure ACEs. However not all outcomes were measured in all studies, and  
17 mental illness was only measured in Wales.<sup>23</sup> Further, generalisability of findings beyond  
18 England and Wales would depend on potential differences in the prevalence of ACEs and  
19 their relationships with key outcomes in other countries. Further, outcome measures could not  
20 be matched directly to GBD categories (see online supplementary table S4). Like previous  
21 ACE studies, the retrospective, self-reported nature of questions makes findings subject to  
22 recall issues and any reluctance to report historical experiences. Our samples were restricted  
23 to adults aged 18-69 years, yet some conditions such as stroke occur predominantly in older  
24 age groups; thus sensitivity analyses were undertaken limiting DALYs to the 15-69 year age  
25 group. While samples were broadly demographically representative of study populations,  
26 compliance across studies was 55.7% and some population groups who may be at increased  
27 exposure to ACEs (e.g. those incarcerated<sup>36</sup> or homeless<sup>37</sup>) will have been underrepresented.  
28 Finally, our estimates of the costs of ACEs should be considered conservative. Whilst our  
29 approach included many key risks for, and causes of, ill-health associated with ACEs it did  
30 not account for other associated outcomes (e.g. risky sexual behaviour, suicide, crime), nor  
31 for the burden of child deaths related to ACEs. A study of child death reviews in an English  
32 locality found evidence of at least one ACE in the records of 63% of children that died over a  
33 four-year period, and of at least four ACEs in 20% of cases.<sup>38</sup> The lifetime cost of a child  
34 maltreatment death in the UK has been estimated at almost £1 million.<sup>35</sup>  
35  
36  
37  
38  
39  
40  
41  
42  
43  
44  
45  
46  
47  
48  
49  
50  
51  
52  
53

### 54 **Meaning of the study**

55 Nearly half of all adults in England and Wales experienced some form of ACE as a child and  
56 around one in 10 experienced  $\geq 4$  ACEs (see online supplementary table S5). This equates to  
57 approximately 20 million adults with any ACE and four million with  $\geq 4$  ACEs. Our results  
58  
59  
60

1  
2  
3 quantify the substantive proportion of common health-harming behaviours and long-term  
4 health conditions that are associated with ACEs, and consequently that could be avoided in  
5 future generations through offering better quality childhoods. Currently however, an  
6 estimated 2.3 million children in England live in families with substantial complex needs and  
7 only a third of these children are receiving established support from statutory services.<sup>39</sup> An  
8 imperative to increase expenditure on safe and nurturing childhoods is emphasised by  
9 findings that around a third of mental illness could be avoided if ACEs were either prevented  
10 or their impacts moderated through early intervention. Mental illness carries one of the  
11 highest costs to health systems in England and Wales<sup>40</sup> and also creates substantial pressure  
12 on educational, social and criminal justice systems. For the latter in particular, strong  
13 relationships found here between ACEs and violence are an additional concern with many  
14 types of police recorded violence increasing in England and Wales.<sup>41</sup> Across all measured  
15 outcomes, we identify potentially avoidable costs from ACEs equivalent to more than a  
16 quarter of the UK's annual government healthcare expenditure.<sup>42</sup> The potential to avoid such  
17 costs is unrealised whilst the majority of health expenditure focuses on adults who have  
18 already developed pathologies. Evidence-based mechanisms to prevent ACEs and build  
19 resilience to their long-term harms are available, offering return on investments in years  
20 rather than decades through benefits on child development, health and education.<sup>43-46</sup> The  
21 benefits of such interventions reach across sectors, and a whole of government approach  
22 could more immediately resource interventions capable of diminishing a current annual ACE  
23 burden of £45 billion.

### 40 **Unanswered questions and future research**

41 As with most ACE studies our data were collected retrospectively and consequently provide  
42 no information on the current levels of ACEs experienced by children in England and Wales.  
43 Options to measure ACE prevalence now form part of the international Health Behaviour in  
44 School-aged children survey (HSBC)<sup>47</sup> but have not yet been used in the English or Welsh  
45 survey iterations. Nor are such data routinely being collected through other major school-  
46 based surveys in the UK. While estimates of current exposure to some ACEs are available,<sup>39</sup>  
47 routine measurement of ACEs in children is required to better understand their extent and  
48 socio-demographic and geographic distribution, as well as the impact of interventions to  
49 address them. Further, our findings identified that, despite having the lowest prevalence, the  
50 majority of costs generated by ACEs fall on those experiencing  $\geq 4$  ACEs (table 2). There is  
51 an urgent need to better understand the cumulative impact of ACEs on health outcomes  
52  
53  
54  
55  
56  
57  
58  
59  
60

1  
2  
3 across the life course, integrating epidemiology with fields including epigenetics,  
4 immunology and neurology. Equally, there is a critical need for knowledge on how services  
5 can become more trauma-informed, what impact trauma-informed service delivery can have,  
6 and how services for children and families affected by child maltreatment, substance abuse,  
7 domestic violence or incarceration, for instance, can be better integrated to provide a  
8 cohesive offer. Finally, as well as the core ACE categories included here, measurements of  
9 other childhood adversities such as neglect, parental bereavement, bullying and exposure to  
10 community level violence are increasingly being incorporated into the list of potential ACEs.  
11 Public services that recognise the impacts of childhood adversity on lifelong health but  
12 neglect to implement preventative measures may yet feature in future lists.  
13  
14  
15  
16  
17  
18  
19  
20  
21

### 22 **Acknowledgements**

23 We would like to thank all those involved in developing and implementing the individual  
24 studies that contributed to this study, and the English and Welsh residents who participated in  
25 the surveys.  
26  
27  
28  
29  
30

### 31 **Author Contributions**

32 MAB and KH designed the study. MAB developed the statistical modelling and KH and KF  
33 conducted data analyses. KH wrote the manuscript with contributions from MAB, KF and  
34 RK. All authors reviewed the study findings and read and approved the final version before  
35 submission. The corresponding author attests that all listed authors meet authorship criteria  
36 and that no others meeting the criteria have been omitted.  
37  
38  
39  
40  
41  
42

### 43 **Funding**

44 This research received no specific grant from any funding agency in the public, commercial  
45 or not-for-profit sectors.  
46  
47  
48  
49

### 50 **Competing interests**

51 All authors have completed the ICMJE uniform disclosure form at  
52 [www.icmje.org/coi\\_disclosure.pdf](http://www.icmje.org/coi_disclosure.pdf) and declare: no support from any organisation for the  
53 submitted work; no financial relationships with any organisations that might have an interest  
54 in the submitted work in the previous three years; no other relationships or activities that  
55 could appear to have influenced the submitted work.  
56  
57  
58  
59  
60

## Ethics approval

Ethical approval for the 2017 Welsh national sample was obtained from Bangor University's Healthcare and Medical Sciences Ethics Committee with ethical approval for all other studies obtained through Liverpool John Moores University Research Ethics Panel. Additional approval for both Welsh surveys was provided by Public Health Wales Research and Development Office.

## Data sharing

The datasets analysed in the current study are available from the corresponding author on reasonable request.

## References

- 1 Hughes K, Bellis MA, Hardcastle KA, et al. The impact of multiple adverse childhood experiences on health: a systematic review and meta-analysis. *Lancet Public Health* 2017;2:e356-66.
- 2 Anda RF, Butchart A, Felitti VJ, Brown DW. Building a framework for global surveillance of the public health implications of adverse childhood experiences. *Am J Prev Med* 2010;39:93-8.
- 3 Berens AE, Jensen SKG, Nelson CA. Biological embedding of childhood adversity: from physiological mechanisms to clinical implications. *BMC Medicine* 2017;15:135.
- 4 Teicher MH, Samson JA, Anderson CM, Ohashi K. The effects of child maltreatment on brain structure, function and connectivity. *Nat Rev Neurosci* 2016;17:652-66.
- 5 Oh DL, Jerman P, Marquez SS, et al. Systematic review of pediatric health outcomes associated with childhood adversity. *BMC Pediatr* 2018;18:83.
- 6 Jimenez ME, Wade Jr R, Lin Y, Morrow LM, Reichman NE. Adverse experiences in early childhood and kindergarten outcomes. *Pediatrics* 2016;137:e20151839.
- 7 Bright M, Thompson LA. Association of adverse childhood experiences with co-occurring health conditions in early childhood. *J Dev Behav Pediatr* 2018;39:37-45.
- 8 Holman DM, Ports KA, Duchanan ND, et al. The association between adverse childhood experiences and risk of cancer in adulthood: a systematic review of the literature. *Pediatrics* 2016;138:S81-S91.



- 1  
2  
3 9 Norman RE, Byambaa M, De R, Butchart A, Scott J, Vos T. The long-term health  
4 consequences of child physical abuse, emotional abuse, and neglect: a systematic  
5 review and meta-analysis. *PLOS Med* 2012;9:e1001349.  
6  
7  
8 10 Peterson C, Florence C, Klevens J. The economic burden of child maltreatment in the  
9 United States, 2015. *Child Abuse Negl* 2018;86:178-83.  
10  
11 11 Fang X, Fry DA, Brown DS, et al. The burden of child maltreatment in the East Asia  
12 and Pacific region. *Child Abuse Negl* 2015;42:146-62.  
13  
14 12 Bellis MA, Hughes K, Ford K, Ramos Rodriguez G, Sethi D, Passmore J. Life course  
15 health consequences and associated annual costs of adverse childhood experiences  
16 across Europe and North America: a meta-analysis. *Lancet Public Health*  
17 2019;4:e517-28.  
18  
19 13 Baglivio MT, Epps N, Swartz K, Sayedul Huq M, Sheer A, Hardt NS. The prevalence  
20 of adverse childhood experiences (ACE) in the lives of juvenile offenders. *J Juv*  
21 *Justice* 2014;3:12-34.  
22  
23 14 Metzler M, Merrick MT, Klevens J, Ports KA, Ford DC. Adverse childhood  
24 experiences and life opportunities: shifting the narrative. *Child Youth Serv Rev*  
25 2017;72:141-9.  
26  
27 15 Hardcastle K, Bellis MA, Ford K, Hughes K, Garner J, Ramos Rodriguez G.  
28 Measuring the relationships between adverse childhood experiences and educational  
29 and employment success in England and Wales: findings from a retrospective study.  
30 *Public Health* 2018;165:106-16.  
31  
32 16 Hughes K, Bellis MA, Sethi D, et al. Adverse childhood experiences, childhood  
33 relationships and associated substance use and mental health in young Europeans. *Eur*  
34 *J Public Health* 2019;29:741-7.  
35  
36 17 Pachter LM, Lieberman L, Bloom SL, Fein JA. Developing a community-wide  
37 initiative to address childhood adversity and toxic stress: a case study of the  
38 Philadelphia ACE Task Force. *Acad Pediatr* 2017;17:S130-5.  
39  
40 18 Science and Technology Select Committee. Evidence-based early years intervention.  
41 UK Parliament 2018;  
42 <https://publications.parliament.uk/pa/cm201719/cmselect/cmsctech/506/50602.htm>  
43 (accessed 30 September 2019).  
44  
45 19 Bellis MA, Hughes K, Leckenby N, Hardcastle K, Perkins C, Lowey H. Measuring  
46 mortality and the burden of adult disease associated with Adverse Childhood  
47 Experiences in England: a national survey. *J Public Health* 2015;37:445-54.  
48  
49  
50  
51  
52  
53  
54  
55  
56  
57  
58  
59  
60

- 1  
2  
3 20 Bellis MA, Lowey H, Leckenby N, Hughes K, Harrison D. Adverse childhood  
4 experiences: retrospective study to determine their impact on adult health behaviours  
5 and health outcomes in a UK population. *J Public Health* 2014;36:81-91.  
6  
7  
8 21 Ford K, Butler N, Hughes K, Quigg Z, Bellis MA. Adverse childhood experiences in  
9 Hertfordshire, Luton and Northamptonshire. Liverpool: Centre for Public Health,  
10 Liverpool John Moores University, 2016.  
11  
12 [https://www.researchgate.net/publication/302589403\\_Adverse\\_Childhood\\_Experiences\\_ACEs\\_in\\_Hertfordshire\\_Luton\\_and\\_Northamptonshire](https://www.researchgate.net/publication/302589403_Adverse_Childhood_Experiences_ACEs_in_Hertfordshire_Luton_and_Northamptonshire) (accessed 16 October  
13 2019).  
14  
15 22 Bellis MA, Ashton K, Hughes K, Ford K, Bishop J, Paranjothy S. Adverse childhood  
16 experiences and their impact on health-harming behaviours in the Welsh population.  
17 Cardiff: Public Health Wales, 2016.  
18  
19 [https://www.researchgate.net/publication/290433553\\_Adverse\\_Childhood\\_Experiences\\_and\\_their\\_impact\\_on\\_health-harming\\_behaviours\\_in\\_the\\_Welsh\\_adult\\_population](https://www.researchgate.net/publication/290433553_Adverse_Childhood_Experiences_and_their_impact_on_health-harming_behaviours_in_the_Welsh_adult_population) (accessed 16 October 2019).  
20  
21  
22 23 Hughes K, Ford K, Davies AR, Homolova L, Bellis MA. Sources of resilience and  
23 their moderating relationships with harms from adverse childhood experiences.  
24 Wrexham: Public Health Wales, 2018.  
25  
26 [https://www.researchgate.net/publication/322697404\\_Sources\\_of\\_resilience\\_and\\_their\\_moderating\\_relationships\\_with\\_harms\\_from\\_adverse\\_childhood\\_experiences\\_Report\\_1\\_Mental\\_Illness](https://www.researchgate.net/publication/322697404_Sources_of_resilience_and_their_moderating_relationships_with_harms_from_adverse_childhood_experiences_Report_1_Mental_Illness) (accessed 16 October 2019).  
27  
28  
29 24 Ministry of Housing, Communities & Local Government. English indices of  
30 deprivation. <https://www.gov.uk/government/collections/english-indices-of-deprivation>  
31 (accessed 17 October 2019).  
32  
33 25 Stats Wales. Welsh Index of Multiple Deprivation.  
34 <https://statswales.gov.wales/Catalogue/Community-Safety-and-Social-Inclusion/Welsh-Index-of-Multiple-Deprivation> (accessed 17 October 2019).  
35  
36  
37 26 Centers for Disease Control and Prevention. BRFSS ACE Module.  
38 <https://www.cdc.gov/violenceprevention/childabuseandneglect/acestudy/ace-brfss.html> (accessed 30 September 2019).  
39  
40  
41 27 Diaz-Quijano FA. A simple method for estimating relative risk using logistic  
42 regression. *BMC Med Res Methodol* 2012;12:14.  
43  
44  
45 28 Brown DW. Economic value of disability-adjusted life years lost to violence:  
46 estimate for WHO Member States. *Pan Am J Public Health* 2008;24:203-9.  
47  
48  
49  
50  
51  
52  
53  
54  
55  
56  
57  
58  
59  
60

- 1  
2  
3  
4 29 Pike J, Grosse SD. Friction cost estimates of productivity costs in cost-of-illness  
5 studies in comparison with human capital estimates: a review. *Appl Health Econ*  
6 *Health Policy* 2018;16:765-78.  
7  
8  
9 30 Institute for Health Metrics and Evaluation. Global burden of disease 2017.  
10 <http://ghdx.healthdata.org/gbd-results-tool> (accessed 25 February 2019).  
11  
12 31 Office for National Statistics. Nominal regional gross value added (balanced) per head  
13 and income components.  
14 <https://www.ons.gov.uk/economy/grossvalueaddedgva/datasets/nominalregionalgross>  
15 [valueaddedbalancedperheadandincomecomponents](https://www.ons.gov.uk/economy/grossvalueaddedgva/datasets/nominalregionalgross) (accessed 17 October 2019).  
16  
17 32 Office for National Statistics. Number of households by local and unitary authorities  
18 in England and Wales, and total number of households in Northern Ireland, 2004 to  
19 2017.  
20 <https://www.ons.gov.uk/peoplepopulationandcommunity/birthsdeathsandmarriages/families/adhocs/010265numberofhouseholdsbylocalandunitaryauthoritiesinenglandand>  
21 [walesandtotalnumberofhouseholdsinnorthernireland2004to2017](https://www.ons.gov.uk/peoplepopulationandcommunity/birthsdeathsandmarriages/families/adhocs/010265numberofhouseholdsbylocalandunitaryauthoritiesinenglandand) (accessed 11 October  
22 2019).  
23  
24 33 Fang X, Zheng X, Fry DA, et al. The economic burden of violence against children in  
25 South Africa. *Int J Environ Res Public Health* 2017;14:E1431.  
26  
27 34 Fang X, Fry DA, Ji K, et al. The burden of child maltreatment in China: a systematic  
28 review. *Bull World Health Organ* 2015;93:176-85C.  
29  
30 35 Conti G, Morris S, Melnychuk M, Pizzo E. The economic costs of child maltreatment  
31 in the UK. London: NSPCC and University College London, 2017.  
32 [https://learning.nspcc.org.uk/research-resources/2017/economic-cost-child-](https://learning.nspcc.org.uk/research-resources/2017/economic-cost-child-maltreatment/)  
33 [maltreatment/](https://learning.nspcc.org.uk/research-resources/2017/economic-cost-child-maltreatment/) (accessed 17 October 2019).  
34  
35 36 Ford K, Newbury A, Barton E, et al. Understanding the prevalence of adverse  
36 childhood experiences (ACEs) in a male offender population in Wales: The Prisoner  
37 ACE Survey. Wrexham: Public Health Wales NHS Trust, Bangor University, 2019.  
38 <https://www.bangor.ac.uk/news/documents/PHW-Prisoner-ACE-Survey-Report-E.pdf>  
39 (accessed 17 October 2019).  
40  
41 37 Sundin EC, Baguley T. Prevalence of childhood abuse among people who are  
42 homeless in Western countries: a systematic review and meta-analysis. *Soc Psychiatry*  
43 *Psychiatr Epidemiol* 2015;50:183-94.  
44  
45  
46  
47  
48  
49  
50  
51  
52  
53  
54  
55  
56  
57  
58  
59  
60

- 1  
2  
3 38 Grey HR, Ford K, Bellis MA, Lowey H, Wood S. Associations between childhood  
4 deaths and adverse childhood experiences: an audit of data from a child death  
5 overview panel. *Child Abuse Negl* 2019;90:22-31.  
6  
7  
8 39 Children's Commissioner for England. Childhood vulnerability in numbers. London:  
9 Children's Commissioner, 2019.  
10  
11 [https://www.childrenscommissioner.gov.uk/publication/childhood-vulnerability-in-](https://www.childrenscommissioner.gov.uk/publication/childhood-vulnerability-in-england-2019/)  
12 [england-2019/](https://www.childrenscommissioner.gov.uk/publication/childhood-vulnerability-in-england-2019/) (accessed 17 October 2019).  
13  
14  
15 40 Mental Health Taskforce to the NHS in England. The five year forward view for  
16 mental health. NHS England, 2016. [https://www.england.nhs.uk/wp-](https://www.england.nhs.uk/wp-content/uploads/2016/02/Mental-Health-Taskforce-FYFV-final.pdf)  
17 [content/uploads/2016/02/Mental-Health-Taskforce-FYFV-final.pdf](https://www.england.nhs.uk/wp-content/uploads/2016/02/Mental-Health-Taskforce-FYFV-final.pdf) (accessed 17  
18 October 2019).  
19  
20  
21  
22 41 Office for National Statistics. Crime in England and Wales: year ending June 2019.  
23 [https://www.ons.gov.uk/peoplepopulationandcommunity/crimeandjustice/bulletins/crim-](https://www.ons.gov.uk/peoplepopulationandcommunity/crimeandjustice/bulletins/criminenglandandwales/yearendingjune2019#rise-in-offences-involving-knives-or-sharp-instruments-and-firearms-offences)  
24 [einenglandandwales/yearendingjune2019#rise-in-offences-involving-knives-or-](https://www.ons.gov.uk/peoplepopulationandcommunity/crimeandjustice/bulletins/criminenglandandwales/yearendingjune2019#rise-in-offences-involving-knives-or-sharp-instruments-and-firearms-offences)  
25 [sharp-instruments-and-firearms-offences](https://www.ons.gov.uk/peoplepopulationandcommunity/crimeandjustice/bulletins/criminenglandandwales/yearendingjune2019#rise-in-offences-involving-knives-or-sharp-instruments-and-firearms-offences) (accessed 21 October 2019).  
26  
27  
28  
29 42 Office for National Statistics. Healthcare expenditure, UK health accounts: 2017.  
30 [https://www.ons.gov.uk/peoplepopulationandcommunity/healthandsocialcare/healthca-](https://www.ons.gov.uk/peoplepopulationandcommunity/healthandsocialcare/healthcare/resystem/bulletins/ukhealthaccounts/2017)  
31 [resystem/bulletins/ukhealthaccounts/2017](https://www.ons.gov.uk/peoplepopulationandcommunity/healthandsocialcare/healthcare/resystem/bulletins/ukhealthaccounts/2017). (accessed 14 October 2019).  
32  
33  
34 43 Britto PR, Lye SJ, Proulx K, et al. Nurturing care: promoting early childhood  
35 development. *Lancet* 2017;389:91-102.  
36  
37  
38 44 Gardner F, Leijten P, Mann J, et al. Could scale up of parenting programmes improve  
39 child disruptive behaviour and reduce social inequalities? Using individual participant  
40 data meta-analysis to establish for whom programmes are effective and cost-effective.  
41 *Public Health Research* 2017;5:10.  
42  
43 <https://www.ncbi.nlm.nih.gov/books/NBK469806/> (accessed 17 October 2019).  
44  
45  
46 45 Ramon I, Chattopadhyay SK, Barnett WS, Hahn RA. Early childhood education to  
47 promote health equity: a community guide economic review. *J Public Health Manag*  
48 *Pract* 2018;24:e8-15.  
49  
50  
51 46 Boparai SKP, Au V, Koita K, et al. Ameliorating the biological impacts of childhood  
52 adversity: a review of intervention programs. *Child Abuse Negl* 2018;81:82-105.  
53  
54  
55 47 Health Behaviour in School-aged Children: World Health Organization collaborative  
56 cross national survey. <http://www.hbsc.org/index.aspx> (accessed 14 October 2019).  
57  
58  
59  
60

1  
2  
3 **Figure 1: Proportion of ACE-attributable costs for each risk factor and cause of ill**  
4 **health attributed to 1, 2-3 and  $\geq 4$  ACE categories**  
5  
6

7 ACE, adverse childhood experience.  
8  
9  
10  
11  
12  
13  
14  
15  
16  
17  
18  
19  
20  
21  
22  
23  
24  
25  
26  
27  
28  
29  
30  
31  
32  
33  
34  
35  
36  
37  
38  
39  
40  
41  
42  
43  
44  
45  
46  
47  
48  
49  
50  
51  
52  
53  
54  
55  
56  
57  
58  
59  
60

For peer review only

**Table 1: Risk ratios for risk factors and causes of ill health at each ACE count level**

|                             | 1 ACE |             |        | 2-3 ACEs |             |        | ≥4 ACEs |             |        |
|-----------------------------|-------|-------------|--------|----------|-------------|--------|---------|-------------|--------|
|                             | RR    | 95%CIs      | P      | RR       | 95%CIs      | P      | RR      | 95%CIs      | P      |
| <b>Risk factors</b>         |       |             |        |          |             |        |         |             |        |
| Binge drinking              | 1.338 | 1.170-1.529 | <0.001 | 1.443    | 1.251-1.664 | <0.001 | 2.280   | 1.993-2.609 | <0.001 |
| Smoking                     | 1.186 | 1.090-1.291 | <0.001 | 1.446    | 1.327-1.575 | <0.001 | 2.076   | 1.902-2.267 | <0.001 |
| Cannabis use                | 1.644 | 1.500-1.801 | <0.001 | 2.173    | 1.990-2.372 | <0.001 | 3.176   | 2.935-3.436 | <0.001 |
| Overweight                  | 1.031 | 0.986-1.078 | 0.181  | 1.061    | 1.011-1.114 | 0.016  | 1.064   | 1.002-1.130 | 0.043  |
| <b>Causes of ill health</b> |       |             |        |          |             |        |         |             |        |
| Depression                  | 1.561 | 1.305-1.866 | <0.001 | 2.144    | 1.826-2.517 | <0.001 | 2.782   | 2.390-3.239 | <0.001 |
| Anxiety                     | 1.440 | 1.178-1.760 | <0.001 | 2.152    | 1.807-2.564 | <0.001 | 2.755   | 2.322-3.268 | <0.001 |
| Other mental illness        | 1.724 | 1.033-2.878 | 0.037  | 3.329    | 2.159-5.133 | <0.001 | 5.354   | 3.531-8.117 | <0.001 |
| Victim of violence          | 1.370 | 1.097-1.711 | 0.005  | 2.942    | 2.440-3.548 | <0.001 | 5.780   | 4.883-6.841 | <0.001 |
| Cancer                      | 1.023 | 0.811-1.290 | 0.850  | 1.133    | 0.879-1.461 | 0.334  | 2.063   | 1.578-2.698 | <0.001 |
| Type 2 diabetes             | 1.169 | 0.968-1.411 | 0.105  | 1.244    | 1.014-1.527 | 0.037  | 1.830   | 1.438-2.328 | <0.001 |
| Heart disease               | 1.094 | 0.831-1.441 | 0.522  | 1.419    | 1.078-1.868 | 0.013  | 1.923   | 1.368-2.704 | <0.001 |
| Stroke                      | 1.277 | 0.826-1.974 | 0.271  | 1.534    | 0.975-2.413 | 0.064  | 2.772   | 1.708-4.497 | <0.001 |
| Respiratory disease         | 1.248 | 0.945-1.646 | 0.118  | 1.855    | 1.422-2.420 | <0.001 | 2.676   | 1.979-3.617 | <0.001 |

Analysis uses generalized linear modelling controlling for study location, age, gender, ethnicity and deprivation quintile.

Reference category = 0 ACEs. ACE, adverse childhood experience; RR, risk ratio; CI, confidence interval.

**Table 2: Population attributable fractions and DALYs and costs attributable to ACEs**

|                      |         | Population attributable fraction |          |         |          | Total DALYs (age 15+) | DALYs attributable to ACEs |          |         |          | Total estimated cost (£ million)* | Attributable costs by ACE count (£ million) |          |         |          |
|----------------------|---------|----------------------------------|----------|---------|----------|-----------------------|----------------------------|----------|---------|----------|-----------------------------------|---------------------------------------------|----------|---------|----------|
|                      |         | 1 ACE                            | 2-3 ACEs | ≥4 ACEs | All ACEs |                       | 1 ACE                      | 2-3 ACEs | ≥4 ACEs | All ACEs |                                   | 1 ACE                                       | 2-3 ACEs | ≥4 ACEs | All ACEs |
| Binge drinking       | Wales   | 0.049                            | 0.052    | 0.125   | 0.227    | 38114                 | 1887                       | 1991     | 4770    | 8647     | 758.4                             | 37.5                                        | 39.6     | 94.9    | 172.1    |
|                      | England | 0.055                            | 0.055    | 0.086   | 0.196    | 606086                | 33041                      | 33225    | 52379   | 118645   | 17028.6                           | 928.3                                       | 933.5    | 1471.7  | 3333.4   |
| Smoking              | Wales   | 0.028                            | 0.055    | 0.110   | 0.193    | 121011                | 3444                       | 6641     | 13281   | 23366    | 2408.0                            | 68.5                                        | 132.1    | 264.3   | 465.0    |
|                      | England | 0.031                            | 0.057    | 0.075   | 0.164    | 1590656               | 49649                      | 91218    | 120073  | 260940   | 44691.1                           | 1394.9                                      | 2562.9   | 3373.6  | 7331.4   |
| Cannabis use         | Wales   | 0.077                            | 0.113    | 0.175   | 0.365    | 22518                 | 1744                       | 2555     | 3930    | 8230     | 448.1                             | 34.7                                        | 50.8     | 78.2    | 163.8    |
|                      | England | 0.087                            | 0.121    | 0.122   | 0.330    | 331956                | 28752                      | 40128    | 40624   | 109504   | 9326.6                            | 807.8                                       | 1127.4   | 1141.4  | 3076.6   |
| Overweight           | Wales   | 0.006                            | 0.009    | 0.008   | 0.023    | 73423                 | 422                        | 663      | 581     | 1665     | 1461.0                            | 8.4                                         | 13.2     | 11.6    | 33.1     |
|                      | England | 0.006                            | 0.009    | 0.005   | 0.020    | 1203925               | 7339                       | 10988    | 6334    | 24661    | 33825.5                           | 206.2                                       | 308.7    | 178.0   | 692.9    |
| Depression           | Wales   | 0.071                            | 0.116    | 0.150   | 0.336    | 16161                 | 1141                       | 1872     | 2417    | 5430     | 321.6                             | 22.7                                        | 37.2     | 48.1    | 108.1    |
|                      | England | 0.078                            | 0.122    | 0.104   | 0.305    | 294592                | 23062                      | 36042    | 30637   | 89741    | 8276.9                            | 647.9                                       | 1012.6   | 860.8   | 2521.4   |
| Anxiety              | Wales   | 0.056                            | 0.119    | 0.150   | 0.325    | 12434                 | 700                        | 1476     | 1863    | 4038     | 247.4                             | 13.9                                        | 29.4     | 37.1    | 80.3     |
|                      | England | 0.062                            | 0.125    | 0.104   | 0.292    | 203872                | 12732                      | 25580    | 21252   | 59564    | 5728.0                            | 357.7                                       | 718.7    | 597.1   | 1673.5   |
| Other mental illness | Wales   | 0.067                            | 0.174    | 0.269   | 0.510    | 28076                 | 1887                       | 4880     | 7564    | 14331    | 558.7                             | 37.5                                        | 97.1     | 150.5   | 285.2    |
|                      | England | 0.078                            | 0.192    | 0.196   | 0.465    | 517544                | 40247                      | 99187    | 101185  | 240619   | 14540.9                           | 1130.8                                      | 2786.8   | 2842.9  | 6760.4   |
| Violence             | Wales   | 0.036                            | 0.150    | 0.307   | 0.493    | 1703                  | 61                         | 256      | 522     | 839      | 33.9                              | 1.2                                         | 5.1      | 10.4    | 16.7     |
|                      | England | 0.042                            | 0.168    | 0.226   | 0.436    | 29134                 | 1221                       | 4906     | 6587    | 12714    | 818.6                             | 34.3                                        | 137.8    | 185.1   | 357.2    |
| Cancer               | Wales   | 0.004                            | 0.018    | 0.116   | 0.137    | 179919                | 667                        | 3153     | 20863   | 24683    | 3580.2                            | 13.3                                        | 62.7     | 415.2   | 491.2    |
|                      | England | 0.004                            | 0.018    | 0.080   | 0.103    | 2725146               | 11129                      | 50104    | 218214  | 279447   | 76565.7                           | 312.7                                       | 1407.7   | 6130.9  | 7851.3   |
| Type 2 diabetes      | Wales   | 0.027                            | 0.032    | 0.089   | 0.148    | 23306                 | 635                        | 739      | 2082    | 3456     | 463.8                             | 12.6                                        | 14.7     | 41.4    | 68.8     |
|                      | England | 0.030                            | 0.033    | 0.061   | 0.124    | 356871                | 10595                      | 11740    | 21781   | 44115    | 10026.6                           | 297.7                                       | 329.8    | 611.9   | 1239.5   |
| Heart disease        | Wales   | 0.015                            | 0.053    | 0.097   | 0.166    | 112947                | 1682                       | 6023     | 10997   | 18703    | 2247.5                            | 33.5                                        | 119.9    | 218.8   | 372.2    |
|                      | England | 0.016                            | 0.056    | 0.067   | 0.139    | 1616873               | 26326                      | 89796    | 107904  | 224025   | 45427.7                           | 739.6                                       | 2522.9   | 3031.7  | 6294.2   |
| Stroke               | Wales   | 0.039                            | 0.060    | 0.165   | 0.264    | 39189                 | 1515                       | 2350     | 6464    | 10330    | 779.8                             | 30.2                                        | 46.8     | 128.6   | 205.5    |
|                      | England | 0.043                            | 0.064    | 0.116   | 0.223    | 546308                | 23608                      | 34882    | 63148   | 121638   | 15349.1                           | 663.3                                       | 980.0    | 1774.2  | 3417.6   |
| Respiratory disease  | Wales   | 0.034                            | 0.094    | 0.152   | 0.280    | 50697                 | 1713                       | 4758     | 7730    | 14201    | 1008.8                            | 34.1                                        | 94.7     | 153.8   | 282.6    |
|                      | England | 0.038                            | 0.099    | 0.106   | 0.243    | 784621                | 29493                      | 78057    | 83469   | 191018   | 22044.7                           | 828.6                                       | 2193.1   | 2345.1  | 5366.9   |

ACE, Adverse childhood experience; DALY, Disability adjusted life year. \*Calculated as 1 DALY = GVA per capita (£19,899 Wales, £28,096 England; Balanced, current basic prices, 2017).

**Table 3: Total ACE-attributable DALYs and costs and sensitivity analyses**

|                                              | ACE-attributable DALYs<br>(thousands) |       |                       | ACE-attributable costs<br>(£ billion) |       |                       | Equivalent % of GVA |       |                       |
|----------------------------------------------|---------------------------------------|-------|-----------------------|---------------------------------------|-------|-----------------------|---------------------|-------|-----------------------|
|                                              | England                               | Wales | England<br>&<br>Wales | England                               | Wales | England<br>&<br>Wales | England             | Wales | England<br>&<br>Wales |
| Best estimate                                | 1521.4                                | 114.8 | 1636.2                | 42.7                                  | 2.3   | 45.0                  | 2.7%                | 3.7%  | 2.8%                  |
| Limited to DALYs for 15-69 year olds         | 972.2                                 | 69.9  | 1042.1                | 27.3                                  | 1.4   | 28.7                  | 1.7%                | 2.2%  | 1.8%                  |
| PAFs generated using lower CIs for RRs       | 576.5                                 | 49.3  | 625.9                 | 16.2                                  | 1.0   | 17.2                  | 1.0%                | 1.6%  | 1.1%                  |
| PAFs generated using upper CIs for RRs       | 2438.9                                | 177.1 | 2616.0                | 68.5                                  | 3.5   | 72.0                  | 4.4%                | 5.7%  | 4.4%                  |
| Lower bound (uncertainty interval) for DALYs | 1348.5                                | 100.7 | 1449.2                | 37.9                                  | 2.0   | 39.9                  | 2.4%                | 3.2%  | 2.5%                  |
| Upper bound (uncertainty interval) for DALYs | 1717.9                                | 131.1 | 1849.0                | 48.3                                  | 2.6   | 50.9                  | 3.1%                | 4.2%  | 3.1%                  |

ACE, Adverse childhood experience; DALY, Disability adjusted life year; GVA, gross value added; PAF, population attributable fraction; CI, confidence interval; RR, risk ratio.



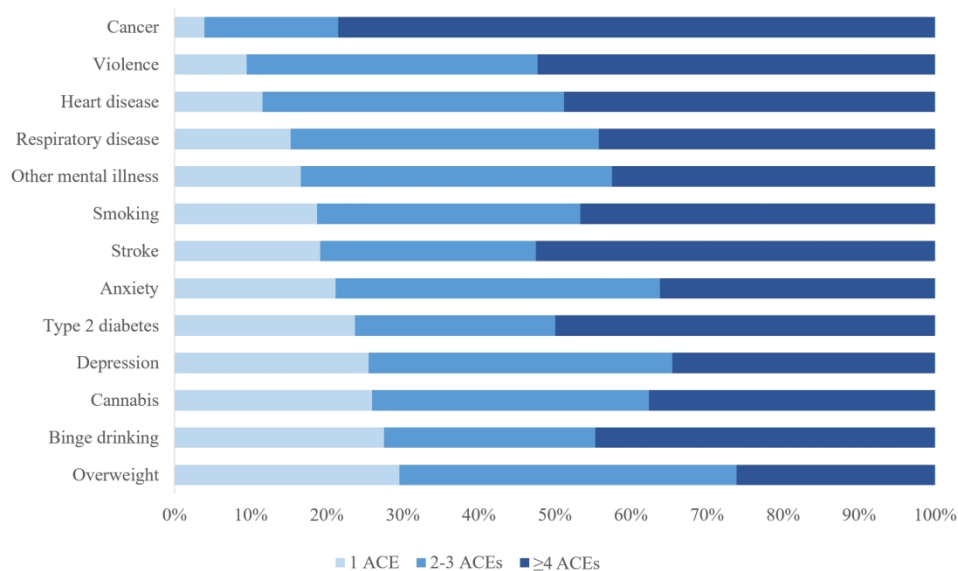

Figure 1: Proportion of ACE-attributable costs for each risk factor and cause of ill health attributed to 1, 2-3 and  $\geq 4$  ACE categories

ACE, adverse childhood experience.

**Supplementary table 1** Study information

| Country | Study location                                             | Stratification for sampling <sup>a</sup>           | Recruitment                                                             | Dates          | Age range (years)  | Total sample <sup>e</sup> (n) | Compliance | Deprivation measure | Reference |
|---------|------------------------------------------------------------|----------------------------------------------------|-------------------------------------------------------------------------|----------------|--------------------|-------------------------------|------------|---------------------|-----------|
| England | Blackburn with Darwen (North West England)                 | Blackburn with Darwen Local Authority <sup>b</sup> | Study information letter sent to randomly selected households;          | 2012 (Aug-Sep) | 18-70 <sup>d</sup> | 1500                          | 70.4%      | IMD 2010            | 1         |
| England | National sample                                            | English Administrative Regions (n=10) <sup>c</sup> | households not opting out upon receipt of letter visited by researchers | 2013 (Apr-Jul) | 18-69              | 4010                          | 53.5%      | IMD 2010            | 2         |
| England | Luton, Hertfordshire Northamptonshire (South East England) | Luton, Hertfordshire Northamptonshire (n=3)        |                                                                         | 2015 (Jun-Sep) | 18-69              | 5623                          | 55.8%      | IMD 2011            | 3         |
| Wales   | National sample                                            | Welsh Health Regions (n=7)                         |                                                                         | 2017 (Mar-Jun) | 18-69              | 2497                          | 58.5%      | WIMD 2014           | 4         |
| Wales   | National sample                                            | Welsh Health Regions (n=7)                         | Households in sampled areas randomly selected by researchers            | 2015 (Feb-May) | 18-69              | 2028                          | 49.1%      | WIMD 2014           | 5         |

<sup>a</sup>Lower Super Output Area level stratification by deprivation quintile. <sup>b</sup>No sub-regional stratification was undertaken in Blackburn with Darwen due to the relatively small size of the sample area. <sup>c</sup>London was split into Inner and Outer London for regional sampling. <sup>d</sup>Individuals aged 70 years were excluded from the sample for consistency. <sup>e</sup>Individuals not completing all questions on variables of interest were excluded. IMD, Index of Multiple Deprivation; WIMD, Welsh Index of Multiple Deprivation.

1. Bellis MA, Lowey H, Leckenby N, Hughes K, Harrison D. Adverse childhood experiences: retrospective study to determine their impact on adult health behaviours and health outcomes in a UK population. *J Public Health* 2014;36:81-91.
2. Bellis MA, Hughes K, Leckenby N, Hardcastle K, Perkins C, Lowey H. Measuring mortality and the burden of adult disease associated with Adverse Childhood Experiences in England: a national survey. *J Public Health* 2015;37:445-54.
3. Ford K, Butler N, Hughes K, Quigg Z, Bellis MA. Adverse childhood experiences in Hertfordshire, Luton and Northamptonshire. Liverpool: Centre for Public Health, Liverpool John Moores University, 2016. [https://www.researchgate.net/publication/302589403\\_Adverse\\_Childhood\\_Experiences\\_ACES\\_in\\_Hertfordshire\\_Luton\\_and\\_Northamptonshire](https://www.researchgate.net/publication/302589403_Adverse_Childhood_Experiences_ACES_in_Hertfordshire_Luton_and_Northamptonshire) (accessed 16 October 2019).
4. Hughes K, Ford K, Davies AR, Homolova L, Bellis MA. Sources of resilience and their moderating relationships with harms from adverse childhood experiences. Wrexham: Public Health Wales, 2018. [https://www.researchgate.net/publication/322697404\\_Sources\\_of\\_resilience\\_and\\_their\\_moderating\\_relationships\\_with\\_harms\\_from\\_adverse\\_childhood\\_experiences\\_Report\\_1\\_Mental\\_Illness](https://www.researchgate.net/publication/322697404_Sources_of_resilience_and_their_moderating_relationships_with_harms_from_adverse_childhood_experiences_Report_1_Mental_Illness) (accessed 16 October 2019).
5. Bellis MA, Ashton K, Hughes K, Ford K, Bishop J, Paranjothy S. Adverse childhood experiences and their impact on health-harming behaviours in the Welsh population. Cardiff: Public Health Wales, 2016. [https://www.researchgate.net/publication/290433553\\_Adverse\\_Childhood\\_Experiences\\_and\\_their\\_impact\\_on\\_health-harming\\_behaviours\\_in\\_the\\_Welsh\\_adult\\_population](https://www.researchgate.net/publication/290433553_Adverse_Childhood_Experiences_and_their_impact_on_health-harming_behaviours_in_the_Welsh_adult_population) (accessed 16 October 2019).

**Supplementary Table 2** ACE and health outcome questions used

| <b>ACE questions.</b> All ACE questions were preceded by the statement “While you were growing up, before the age of 18...” |                                                                                                                                                                                                                                                                                                                                                                        |                                                                   |
|-----------------------------------------------------------------------------------------------------------------------------|------------------------------------------------------------------------------------------------------------------------------------------------------------------------------------------------------------------------------------------------------------------------------------------------------------------------------------------------------------------------|-------------------------------------------------------------------|
| <b>ACE</b>                                                                                                                  | <b>Question</b>                                                                                                                                                                                                                                                                                                                                                        | <b>Qualifying responses</b>                                       |
| <i>Physical abuse</i>                                                                                                       | How often did a parent or adult in your home ever hit, beat, kick, or physically hurt you in any way? This does not include gentle smacking for punishment?                                                                                                                                                                                                            | Once; more than once                                              |
| <i>Verbal abuse</i>                                                                                                         | How often did a parent or adult in your home ever swear at you, insult you, or put you down?                                                                                                                                                                                                                                                                           | More than once                                                    |
| <i>Sexual abuse</i>                                                                                                         | How often did anyone at least 5 years older than you (including adults) ever touch you sexually?<br>How often did anyone at least 5 years older than you (including adults) try to make you touch them sexually?<br>How often did anyone at least 5 years older than you (including adults) force you to have any type of sexual intercourse (oral, anal, or vaginal)? | Once or more than once to any of the questions                    |
| <i>Parental separation</i>                                                                                                  | Were your parents ever separated or divorced?                                                                                                                                                                                                                                                                                                                          | Yes                                                               |
| <i>Domestic violence</i>                                                                                                    | How often did your parents or adults in your home ever slap, hit, kick, punch, or beat each other up?                                                                                                                                                                                                                                                                  | Once; more than once                                              |
| <i>Mental illness</i>                                                                                                       | Did you live with anyone who was depressed, mentally ill, or suicidal?                                                                                                                                                                                                                                                                                                 | Yes                                                               |
| <i>Alcohol abuse</i>                                                                                                        | Did you live with anyone who was a problem drinker or alcoholic?                                                                                                                                                                                                                                                                                                       | Yes                                                               |
| <i>Drug abuse</i>                                                                                                           | Did you live with anyone who used illegal street drugs or who abused prescription medications?                                                                                                                                                                                                                                                                         | Yes                                                               |
| <i>Incarceration</i>                                                                                                        | Did you live with anyone who served time or was sentenced to serve time in a prison or young offenders' institution?                                                                                                                                                                                                                                                   | Yes                                                               |
| <b>Health outcome</b>                                                                                                       | <b>Question</b>                                                                                                                                                                                                                                                                                                                                                        | <b>Qualifying responses</b>                                       |
| <i>Binge drinking</i>                                                                                                       | How often do you have 6 or more standard drinks on one occasion?                                                                                                                                                                                                                                                                                                       | Weekly; daily/almost daily                                        |
| <i>Smoking</i>                                                                                                              | In terms of smoking tobacco, which of the following best describes you?                                                                                                                                                                                                                                                                                                | I smoke daily; I smoke occasionally but not daily                 |
| <i>Cannabis use</i>                                                                                                         | How often, if ever, have you taken.... Cannabis?                                                                                                                                                                                                                                                                                                                       | Used but not in the last 12 months;<br>Used in the past 12 months |
| <i>Overweight</i>                                                                                                           | What is your height? (in feet/inches or metres/centimetres)<br>What is your weight? (in stone/pound, kilograms or pounds)<br>Answers used to calculate BMI                                                                                                                                                                                                             | BMI 25.0 or higher                                                |
| <i>Depression</i>                                                                                                           | Are you currently or have you ever been treated for... depression?                                                                                                                                                                                                                                                                                                     | Yes, currently; Yes, in the past                                  |
| <i>Anxiety</i>                                                                                                              | Are you currently or have you ever been treated for... anxiety?                                                                                                                                                                                                                                                                                                        | Yes, currently; Yes, in the past                                  |
| <i>Other mental illness</i>                                                                                                 | Are you currently or have you ever been treated for... another mental illness?                                                                                                                                                                                                                                                                                         | No, never; Yes, currently; Yes, in the past                       |
| <i>Victim of violence</i>                                                                                                   | How many times have you been physically hit in the past 12 months?<br>Or (in Wales, 2017): In the past 12 months, have you been physically hit by someone else?                                                                                                                                                                                                        | Once; 2 or 3 times; More than 3 times<br>Yes                      |
| <i>Cancer</i>                                                                                                               | Has a doctor or nurse ever told you that you have... Cancer?                                                                                                                                                                                                                                                                                                           | Yes                                                               |
| <i>Type 2 diabetes</i>                                                                                                      | Has a doctor or nurse ever told you that you have... Type 2 diabetes?                                                                                                                                                                                                                                                                                                  | Yes                                                               |
| <i>Heart disease</i>                                                                                                        | Has a doctor or nurse ever told you that you have... Coronary Heart Disease or heart attack?                                                                                                                                                                                                                                                                           | Yes                                                               |
| <i>Stroke</i>                                                                                                               | Has a doctor or nurse ever told you that you have... Stroke?                                                                                                                                                                                                                                                                                                           | Yes                                                               |
| <i>Respiratory disease</i>                                                                                                  | Has a doctor or nurse ever told you that you have... Respiratory disease such as Chronic bronchitis/ Emphysema/ Chronic Obstructive Pulmonary Disease?                                                                                                                                                                                                                 | Yes                                                               |

ACE, adverse childhood experience; BMI, body mass index.

**Supplementary Table 3** Outcomes measured across studies

|                      | All     | England<br>(national) | England<br>(South<br>East) | England<br>(North<br>West) | Wales<br>2015<br>(national) | Wales<br>2017<br>(national) |
|----------------------|---------|-----------------------|----------------------------|----------------------------|-----------------------------|-----------------------------|
| Total sample (n)     | 15285   | 3885                  | 5454                       | 1421                       | 2028                        | 2497                        |
| Binge drinking       | n=12769 |                       |                            |                            |                             |                             |
| Missing (n)          | 19      | 2                     | 4                          | 11                         | 2                           | -                           |
| Yes (%)              | 9.9     | 11.3                  | 6.6                        | 12.6                       | 14.1                        | -                           |
| Smoking              | n=15281 |                       |                            |                            |                             |                             |
| Missing (n)          | 4       | 0                     | 0                          | 4                          | 0                           | 0                           |
| Yes (%)              | 26.3    | 26.9                  | 23.1                       | 37.1                       | 27.9                        | 25.3                        |
| Cannabis use         | n=15241 |                       |                            |                            |                             |                             |
| Missing (n)          | 44      | 7                     | 28                         | 5                          | 3                           | 1                           |
| Yes (%)              | 18.1    | 19.5                  | 14.6                       | 18.1                       | 25.0                        | 17.6                        |
| Overweight           | n=11527 |                       |                            |                            |                             |                             |
| Missing (n)          | 1261    | 424                   | 481                        | 16                         | 340                         | -                           |
| Yes (%)              | 49.8    | 50.9                  | 49.0                       | 45.7                       | 53.2                        | -                           |
| Depression           | n=2496  |                       |                            |                            |                             |                             |
| Missing (n)          | 1       | -                     | -                          | -                          | -                           | 1                           |
| Yes (%)              | 29.2    | -                     | -                          | -                          | -                           | 29.2                        |
| Anxiety              | n=2493  |                       |                            |                            |                             |                             |
| Missing (n)          | 4       | -                     | -                          | -                          | -                           | 4                           |
| Yes (%)              | 25.0    | -                     | -                          | -                          | -                           | 25.0                        |
| Other mental illness | n=2491  |                       |                            |                            |                             |                             |
| Missing (n)          | 6       | -                     | -                          | -                          | -                           | 6                           |
| Yes (%)              | 6.0     | -                     | -                          | -                          | -                           | 6.0                         |
| Victim of violence   | n=15267 |                       |                            |                            |                             |                             |
| Missing (n)          | 18      | 2                     | 10                         | 2                          | 4                           | 0                           |
| Yes (%)              | 5.1     | 5.3                   | 3.7                        | 6.3                        | 9.1                         | 4.1                         |
| Cancer               | n=12765 |                       |                            |                            |                             |                             |
| Missing (n)          | 23      | 4                     | 12                         | 7                          | 0                           | -                           |
| Yes (%)              | 3.7     | 4.4                   | 2.9                        | 3.2                        | 4.8                         | -                           |
| Type 2 Diabetes      | n=12769 |                       |                            |                            |                             |                             |
| Missing (n)          | 19      | 3                     | 12                         | 4                          | 0                           | -                           |
| Yes (%)              | 5.1     | 4.8                   | 4.7                        | 7.3                        | 5.3                         | -                           |
| Heart disease        | n=12773 |                       |                            |                            |                             |                             |
| Missing (n)          | 15      | 1                     | 12                         | 2                          | 0                           | -                           |
| Yes (%)              | 2.7     | 3.2                   | 2.3                        | 4.2                        | 1.5                         | -                           |
| Stroke               | n=12773 |                       |                            |                            |                             |                             |
| Missing (n)          | 19      | 1                     | 13                         | 5                          | 0                           | -                           |
| Yes (%)              | 1.1     | 1.1                   | 1.0                        | 1.8                        | 0.8                         | -                           |
| Respiratory disease  | n=12766 |                       |                            |                            |                             |                             |
| Missing (n)          | 22      | 0                     | 15                         | 7                          | 0                           | -                           |
| Yes (%)              | 2.8     | 3.5                   | 1.9                        | 5.2                        | 2.1                         | -                           |

- outcome not measured in survey.

**Supplementary Table 4: Study outcome and matched Global Burden of Disease (GBD) category**

| <b>Outcome</b>              | <b>GBD category matched (ID)</b>                                                              |
|-----------------------------|-----------------------------------------------------------------------------------------------|
| <b>Risk factors</b>         |                                                                                               |
| Binge drinking              | Alcohol use (102)                                                                             |
| Smoking                     | Smoking (99)                                                                                  |
| Cannabis use                | Drug use (103)                                                                                |
| Overweight                  | High body-mass index (108)                                                                    |
| <b>Causes of ill health</b> |                                                                                               |
| Depression                  | Major depressive disorder (586)                                                               |
| Anxiety                     | Anxiety disorders (571)                                                                       |
| Other mental illness        | Mental disorders (558), excluding major depressive disorder (586) and anxiety disorders (571) |
| Victim of violence          | Interpersonal violence (724)                                                                  |
| Cancer                      | Neoplasms (410)                                                                               |
| Type 2 diabetes             | Diabetes mellitus type 2 (976)                                                                |
| Heart disease               | Cardiovascular diseases (491), excluding stroke (494)                                         |
| Stroke                      | Stroke (494)                                                                                  |
| Respiratory disease         | Chronic respiratory diseases (508), excluding asthma (515)                                    |

ID, identification.

**Supplementary Table 5** Sample demographics and ACE count prevalence

|                                 | All   | England<br>(national) | England<br>(South East) | England<br>(North West) | Wales 2015<br>(national) | Wales 2017<br>(national) |
|---------------------------------|-------|-----------------------|-------------------------|-------------------------|--------------------------|--------------------------|
| <b>Total sample (n)</b>         | 15285 | 3885                  | 5454                    | 1421                    | 2028                     | 2497                     |
| <b>Gender (%)</b>               |       |                       |                         |                         |                          |                          |
| Male                            | 45.1  | 45.0                  | 44.7                    | 39.9                    | 49.8                     | 45.3                     |
| Female                          | 54.9  | 55.0                  | 55.3                    | 60.1                    | 50.2                     | 54.7                     |
| <b>Age group (%)</b>            |       |                       |                         |                         |                          |                          |
| 18-29                           | 21.9  | 21.0                  | 20.6                    | 24.6                    | 30.4                     | 17.9                     |
| 30-39                           | 19.9  | 19.9                  | 22.5                    | 21.5                    | 14.2                     | 18.4                     |
| 40-49                           | 20.3  | 20.5                  | 20.6                    | 22.2                    | 17.8                     | 20.1                     |
| 50-59                           | 17.7  | 18.0                  | 17.0                    | 14.6                    | 17.5                     | 20.6                     |
| 60-69                           | 20.2  | 20.7                  | 19.3                    | 17.0                    | 20.2                     | 23.1                     |
| <b>Ethnicity (%)</b>            |       |                       |                         |                         |                          |                          |
| White                           | 85.7  | 86.3                  | 80.6                    | 71.3                    | 95.4                     | 96.4                     |
| Other                           | 14.3  | 13.7                  | 19.4                    | 28.7                    | 4.6                      | 3.6                      |
| <b>Deprivation quintile (%)</b> |       |                       |                         |                         |                          |                          |
| (least deprived) 1              | 21.7  | 20.1                  | 28.5                    | 5.5                     | 21.7                     | 18.7                     |
| 2                               | 19.1  | 19.5                  | 20.2                    | 10.2                    | 19.4                     | 20.9                     |
| 3                               | 19.9  | 19.7                  | 20.8                    | 8.1                     | 19.4                     | 25.1                     |
| 4                               | 19.2  | 19.9                  | 20.0                    | 14.5                    | 18.7                     | 19.3                     |
| (most deprived) 5               | 20.1  | 20.7                  | 10.5                    | 61.7                    | 20.7                     | 15.9                     |
| <b>ACE count (%)</b>            |       |                       |                         |                         |                          |                          |
| 0                               | 55.3  | 53.6                  | 58.4                    | 54.4                    | 54.4                     | 52.1                     |
| 1                               | 19.7  | 22.7                  | 18.2                    | 20.0                    | 19.0                     | 18.9                     |
| 2-3                             | 15.3  | 15.4                  | 15.3                    | 15.8                    | 13.0                     | 17.1                     |
| ≥4                              | 9.6   | 8.3                   | 8.1                     | 9.8                     | 13.6                     | 11.9                     |

ACE, Adverse childhood experience.

**Supplementary Table 6** Unadjusted proportion reporting each outcome by ACE count category

|                      | n     | ACE count |       |          |         |
|----------------------|-------|-----------|-------|----------|---------|
|                      |       | 0 ACEs    | 1 ACE | 2-3 ACEs | ≥4 ACEs |
| Binge drinking       | 12769 | 7.1       | 11.2  | 12.0     | 19.9    |
| Smoking              | 15281 | 20.3      | 26.3  | 32.9     | 50.6    |
| Cannabis use         | 15241 | 10.6      | 19.9  | 26.2     | 43.9    |
| Overweight           | 11527 | 49.3      | 49.8  | 51.1     | 50.6    |
| Depression           | 2496  | 18.4      | 29.4  | 41.3     | 59.1    |
| Anxiety              | 2493  | 16.0      | 24.2  | 36.5     | 49.8    |
| Other mental illness | 2491  | 2.8       | 4.9   | 9.9      | 16.4    |
| Violence             | 15267 | 2.5       | 3.8   | 8.3      | 18.2    |
| Cancer               | 12765 | 3.5       | 3.5   | 3.7      | 5.1     |
| Type 2 diabetes      | 12769 | 5.0       | 5.0   | 5.3      | 5.6     |
| Heart disease        | 12773 | 2.5       | 2.5   | 3.2      | 3.1     |
| Stroke               | 12769 | 0.9       | 1.1   | 1.3      | 1.8     |
| Respiratory disease  | 12766 | 2.2       | 2.7   | 4.0      | 4.7     |

ACE, adverse childhood experience.

STROBE Statement—Checklist of items that should be included in reports of *cross-sectional studies*

|                              | Item No                                                                            | Recommendation                                                                                                                                                                                    | Page No           |
|------------------------------|------------------------------------------------------------------------------------|---------------------------------------------------------------------------------------------------------------------------------------------------------------------------------------------------|-------------------|
| <b>Title and abstract</b>    | 1                                                                                  | (a) Indicate the study's design with a commonly used term in the title or the abstract                                                                                                            | 1                 |
|                              |                                                                                    | (b) Provide in the abstract an informative and balanced summary of what was done and what was found                                                                                               | 2                 |
| <b>Introduction</b>          |                                                                                    |                                                                                                                                                                                                   |                   |
| Background/rationale         | 2                                                                                  | Explain the scientific background and rationale for the investigation being reported                                                                                                              | 3                 |
| Objectives                   | 3                                                                                  | State specific objectives, including any prespecified hypotheses                                                                                                                                  | 4                 |
| <b>Methods</b>               |                                                                                    |                                                                                                                                                                                                   |                   |
| Study design                 | 4                                                                                  | Present key elements of study design early in the paper                                                                                                                                           | 4-6               |
| Setting                      | 5                                                                                  | Describe the setting, locations, and relevant dates, including periods of recruitment, exposure, follow-up, and data collection                                                                   | 4, Table S1       |
| Participants                 | 6                                                                                  | (a) Give the eligibility criteria, and the sources and methods of selection of participants                                                                                                       | 4                 |
| Variables                    | 7                                                                                  | Clearly define all outcomes, exposures, predictors, potential confounders, and effect modifiers. Give diagnostic criteria, if applicable                                                          | 5, Table S2       |
| Data sources/<br>measurement | 8*                                                                                 | For each variable of interest, give sources of data and details of methods of assessment (measurement). Describe comparability of assessment methods if there is more than one group              | 5, Tables S2 & S3 |
| Bias                         | 9                                                                                  | Describe any efforts to address potential sources of bias                                                                                                                                         | 6                 |
| Study size                   | 10                                                                                 | Explain how the study size was arrived at                                                                                                                                                         | 4                 |
| Quantitative variables       | 11                                                                                 | Explain how quantitative variables were handled in the analyses. If applicable, describe which groupings were chosen and why                                                                      | 5, 6, Table S2    |
| Statistical methods          | 12                                                                                 | (a) Describe all statistical methods, including those used to control for confounding                                                                                                             | 5,6               |
|                              |                                                                                    | (b) Describe any methods used to examine subgroups and interactions                                                                                                                               | 5,6               |
|                              | (c) Explain how missing data were addressed                                        | Table S3                                                                                                                                                                                          |                   |
|                              | (d) If applicable, describe analytical methods taking account of sampling strategy | 5                                                                                                                                                                                                 |                   |
|                              | (e) Describe any sensitivity analyses                                              | 6                                                                                                                                                                                                 |                   |
| <b>Results</b>               |                                                                                    |                                                                                                                                                                                                   |                   |
| Participants                 | 13*                                                                                | (a) Report numbers of individuals at each stage of study—eg numbers potentially eligible, examined for eligibility, confirmed eligible, included in the study, completing follow-up, and analysed | 4, Table S1       |
|                              |                                                                                    | (b) Give reasons for non-participation at each stage                                                                                                                                              | NA                |
|                              |                                                                                    | (c) Consider use of a flow diagram                                                                                                                                                                | NA                |
| Descriptive data             | 14*                                                                                | (a) Give characteristics of study participants (eg demographic, clinical, social) and information on exposures and potential confounders                                                          | Table S5          |
|                              |                                                                                    | (b) Indicate number of participants with missing data for each variable of interest                                                                                                               | Table S3          |
| Outcome data                 | 15*                                                                                | Report numbers of outcome events or summary measures                                                                                                                                              | Table S3          |



|    |                          |    |                                                                                                                                                                                                              |
|----|--------------------------|----|--------------------------------------------------------------------------------------------------------------------------------------------------------------------------------------------------------------|
| 1  |                          |    |                                                                                                                                                                                                              |
| 2  | Main results             | 16 | (a) Give unadjusted estimates and, if applicable, confounder-adjusted estimates and their precision (eg, 95% confidence interval). Make clear which confounders were adjusted for and why they were included |
| 3  |                          |    | 5, Table S6, Table 1                                                                                                                                                                                         |
| 4  |                          |    |                                                                                                                                                                                                              |
| 5  |                          |    |                                                                                                                                                                                                              |
| 6  |                          |    |                                                                                                                                                                                                              |
| 7  |                          |    | (b) Report category boundaries when continuous variables were categorized                                                                                                                                    |
| 8  |                          |    | NA                                                                                                                                                                                                           |
| 9  |                          |    |                                                                                                                                                                                                              |
| 10 |                          |    | (c) If relevant, consider translating estimates of relative risk into absolute risk for a meaningful time period                                                                                             |
| 11 |                          |    | 7, Table 2                                                                                                                                                                                                   |
| 12 | Other analyses           | 17 | Report other analyses done—eg analyses of subgroups and interactions, and sensitivity analyses                                                                                                               |
| 13 |                          |    | 8, Table 3                                                                                                                                                                                                   |
| 14 |                          |    |                                                                                                                                                                                                              |
| 15 | <b>Discussion</b>        |    |                                                                                                                                                                                                              |
| 16 | Key results              | 18 | Summarise key results with reference to study objectives                                                                                                                                                     |
| 17 |                          |    | 8                                                                                                                                                                                                            |
| 18 | Limitations              | 19 | Discuss limitations of the study, taking into account sources of potential bias or imprecision. Discuss both direction and magnitude of any potential bias                                                   |
| 19 |                          |    | 9                                                                                                                                                                                                            |
| 20 |                          |    |                                                                                                                                                                                                              |
| 21 | Interpretation           | 20 | Give a cautious overall interpretation of results considering objectives, limitations, multiplicity of analyses, results from similar studies, and other relevant evidence                                   |
| 22 |                          |    | 8-10                                                                                                                                                                                                         |
| 23 |                          |    |                                                                                                                                                                                                              |
| 24 |                          |    |                                                                                                                                                                                                              |
| 25 | Generalisability         | 21 | Discuss the generalisability (external validity) of the study results                                                                                                                                        |
| 26 |                          |    | 9                                                                                                                                                                                                            |
| 27 | <b>Other information</b> |    |                                                                                                                                                                                                              |
| 28 | Funding                  | 22 | Give the source of funding and the role of the funders for the present study and, if applicable, for the original study on which the present article is based                                                |
| 29 |                          |    | 12                                                                                                                                                                                                           |
| 30 |                          |    |                                                                                                                                                                                                              |
| 31 |                          |    |                                                                                                                                                                                                              |
| 32 |                          |    |                                                                                                                                                                                                              |

\*Give information separately for exposed and unexposed groups.

**Note:** An Explanation and Elaboration article discusses each checklist item and gives methodological background and published examples of transparent reporting. The STROBE checklist is best used in conjunction with this article (freely available on the Web sites of PLoS Medicine at <http://www.plosmedicine.org/>, Annals of Internal Medicine at <http://www.annals.org/>, and Epidemiology at <http://www.epidem.com/>). Information on the STROBE Initiative is available at [www.strobe-statement.org](http://www.strobe-statement.org).

# BMJ Open

## The health and financial burden of Adverse Childhood Experiences in England and Wales: a combined primary data study of five surveys

|                                 |                                                                                                                                                                                                                                                                                                                                                                                                                                                                                                                                       |
|---------------------------------|---------------------------------------------------------------------------------------------------------------------------------------------------------------------------------------------------------------------------------------------------------------------------------------------------------------------------------------------------------------------------------------------------------------------------------------------------------------------------------------------------------------------------------------|
| Journal:                        | <i>BMJ Open</i>                                                                                                                                                                                                                                                                                                                                                                                                                                                                                                                       |
| Manuscript ID                   | bmjopen-2019-036374.R1                                                                                                                                                                                                                                                                                                                                                                                                                                                                                                                |
| Article Type:                   | Original research                                                                                                                                                                                                                                                                                                                                                                                                                                                                                                                     |
| Date Submitted by the Author:   | 11-Feb-2020                                                                                                                                                                                                                                                                                                                                                                                                                                                                                                                           |
| Complete List of Authors:       | Hughes, Karen; Public Health Wales, Policy and International Health; Bangor University, School of Health Sciences<br>Ford, Kat; Bangor University, College of Health and Behavioural Sciences<br>Kadel, Rajendra; Public Health Wales, Policy and International Health<br>Sharp, Catherine; Bangor University, Public Health Collaborating Unit, BIHMR, College of Human Sciences<br>Bellis, Mark; Bangor University, College of Health and Behavioural Sciences; Public Health Wales, Policy, Research and International Development |
| <b>Primary Subject Heading</b>: | Public health                                                                                                                                                                                                                                                                                                                                                                                                                                                                                                                         |
| Secondary Subject Heading:      | Epidemiology, Health economics                                                                                                                                                                                                                                                                                                                                                                                                                                                                                                        |
| Keywords:                       | PUBLIC HEALTH, HEALTH ECONOMICS, EPIDEMIOLOGY                                                                                                                                                                                                                                                                                                                                                                                                                                                                                         |
|                                 |                                                                                                                                                                                                                                                                                                                                                                                                                                                                                                                                       |

SCHOLARONE™  
Manuscripts

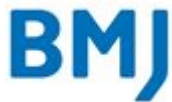

I, the Submitting Author has the right to grant and does grant on behalf of all authors of the Work (as defined in the below author licence), an exclusive licence and/or a non-exclusive licence for contributions from authors who are: i) UK Crown employees; ii) where BMJ has agreed a CC-BY licence shall apply, and/or iii) in accordance with the terms applicable for US Federal Government officers or employees acting as part of their official duties; on a worldwide, perpetual, irrevocable, royalty-free basis to BMJ Publishing Group Ltd ("BMJ") its licensees and where the relevant Journal is co-owned by BMJ to the co-owners of the Journal, to publish the Work in this journal and any other BMJ products and to exploit all rights, as set out in our [licence](#).

The Submitting Author accepts and understands that any supply made under these terms is made by BMJ to the Submitting Author unless you are acting as an employee on behalf of your employer or a postgraduate student of an affiliated institution which is paying any applicable article publishing charge ("APC") for Open Access articles. Where the Submitting Author wishes to make the Work available on an Open Access basis (and intends to pay the relevant APC), the terms of reuse of such Open Access shall be governed by a Creative Commons licence – details of these licences and which [Creative Commons](#) licence will apply to this Work are set out in our licence referred to above.

Other than as permitted in any relevant BMJ Author's Self Archiving Policies, I confirm this Work has not been accepted for publication elsewhere, is not being considered for publication elsewhere and does not duplicate material already published. I confirm all authors consent to publication of this Work and authorise the granting of this licence.

|                      |                                                                                                                                                                                                                                                                                                                                                                                                                                                                                                                                                                                                                                                                                                                                                                                                            |
|----------------------|------------------------------------------------------------------------------------------------------------------------------------------------------------------------------------------------------------------------------------------------------------------------------------------------------------------------------------------------------------------------------------------------------------------------------------------------------------------------------------------------------------------------------------------------------------------------------------------------------------------------------------------------------------------------------------------------------------------------------------------------------------------------------------------------------------|
| Title                | The health and financial burden of Adverse Childhood Experiences in England and Wales: a combined primary data study of five surveys                                                                                                                                                                                                                                                                                                                                                                                                                                                                                                                                                                                                                                                                       |
| Authors              | Karen Hughes <sup>1,2</sup> (0000-0001-8097-3395), Kat Ford <sup>2</sup> (0000-0002-2984-5838), Rajendra Kadel <sup>1</sup> (0000-0002-2547-6342), Catherine A. Sharp <sup>2</sup> (0000-0002-7311-3933), Mark A Bellis <sup>1,2</sup> (0000-0001-6980-1963)                                                                                                                                                                                                                                                                                                                                                                                                                                                                                                                                               |
| Addresses            | <p><sup>1</sup>World Health Organization Collaborating Centre on Investment for Health and Well-being, Policy and International Health, Public Health Wales, Wrexham, LL13 7YP, UK</p> <p>Karen Hughes, <a href="mailto:k.e.hughes@bangor.ac.uk">k.e.hughes@bangor.ac.uk</a></p> <p>Rajendra Kadel, <a href="mailto:Rajendra.Kadel@wales.nhs.uk">Rajendra.Kadel@wales.nhs.uk</a></p> <p>Mark A Bellis, <a href="mailto:m.a.bellis@bangor.ac.uk">m.a.bellis@bangor.ac.uk</a></p> <p><sup>2</sup>Public Health Collaborating Unit, School of Health Sciences, College of Human Sciences, Bangor University, Wrexham, LL13 7YP, UK</p> <p>Kat Ford, <a href="mailto:k.ford@bangor.ac.uk">k.ford@bangor.ac.uk</a></p> <p>Catherine A Sharp, <a href="mailto:c.sharp@bangor.ac.uk">c.sharp@bangor.ac.uk</a></p> |
| Corresponding author | Correspondence to: Karen Hughes, World Health Organization Collaborating Centre on Investment for Health and Well-being, Policy and International Health, Public Health Wales, Wrexham, UK, LL13 7YP<br><a href="mailto:k.e.hughes@bangor.ac.uk">k.e.hughes@bangor.ac.uk</a>                                                                                                                                                                                                                                                                                                                                                                                                                                                                                                                               |
| Word count           | 3,332                                                                                                                                                                                                                                                                                                                                                                                                                                                                                                                                                                                                                                                                                                                                                                                                      |

## Abstract

**Objectives:** To estimate the health and financial burden of adverse childhood experiences (ACEs) in England and Wales.

**Design:** Combined data from five randomly stratified cross-sectional ACE studies. Population attributable fractions (PAFs) calculated for major health risks and causes of ill-health and applied to disability adjusted life years (DALYs) with financial costs estimated using a modified human capital method.

**Setting:** Households in England and Wales.

**Participants:** 15,285 residents aged 18-69.

**Outcome measures:** PAFs for single (1 ACE) and multiple (2-3,  $\geq 4$  ACEs) ACE exposure categories for four health risks (smoking, alcohol use, drug use, high BMI) and nine causes of ill-health (cancer, type 2 diabetes, heart disease, respiratory disease, stroke, violence, anxiety, depression, other mental illness). Annual estimated DALYs and financial costs attributable to ACEs.

**Results:** Cumulative relationships were found between ACEs and risks of all outcomes. For health risks, PAFs for ACEs were highest for drug use (Wales 58.8%, England 52.6%) although ACE-attributable smoking had the highest estimated costs (England and Wales, £7.8 billion). For causes of ill-health, PAFs for ACEs were highest for violence (Wales 48.9%, England 43.4%) and mental illness (ranging from 29.1% for anxiety in England to 49.7% for other mental illness in Wales). The greatest ACE-attributable costs were for mental illness (anxiety, depression and other mental illness; England and Wales, £11.2 billion) and cancer (£7.9 billion). Across all outcomes, total annual ACE-attributable costs were estimated at £42.8 billion. The majority of costs related to exposures to multiple rather than a single ACE (ranging from 71.9% for high BMI to 98.3% for cancer).

**Conclusions:** ACEs impose a substantial societal burden in England and Wales. Policies and practices that prevent ACEs, build resilience and develop trauma-informed services are needed to reduce burden of disease and avoidable service use and financial costs across health and other sectors.

## Article Summary

### Strengths and limitations of this study

- Adverse childhood experiences (ACEs) are known to increase individuals' risks of poor health across the life course yet the financial burden they impose on national economies is largely unmeasured.
- We combined primary data on ACEs and 13 health outcomes from five general population ACE surveys undertaken in England and Wales.
- For each outcome, we generated population attributable fractions for cumulative ACE exposure and applied these to disability adjusted life years which, in turn, allowed calculation of financial burden of ACEs using a modified human capital approach.
- ACE data were retrospectively reported and may be affected by recall bias, while general household surveys by their nature are likely to exclude those that have suffered the greatest impact of ACEs (e.g. homelessness, incarceration or premature death).
- Although many major health outcomes were included in the study, data are not yet available on all health outcomes potentially associated with ACEs and financial estimates are likely to be conservative.

## Introduction

Evidence linking adverse childhood experiences (ACEs) to the adoption of health-risk behaviours and the development of mental and physical illness has burgeoned in recent years.<sup>1</sup> The term ACEs is used to describe some of the most intense sources of stress that children can suffer whilst growing up, such as being maltreated, witnessing domestic violence or coping with parental substance abuse.<sup>2</sup> Such experiences can have harmful effects on children's developing neurological and physiological systems that can embed vulnerability to poor health and well-being. Thus repeated activation of the stress response system during childhood and a lack of responsive interaction with caring adults can impact on brain structure, neuroendocrine stress regulation, immune functioning and metabolic health, as well as social and emotional development.<sup>3,4</sup> Consistent with such effects, ACEs have been associated with delayed child development (e.g. cognitive and language skills), childhood health and behavioural conditions, the adoption of health-risk behaviours (e.g. substance use), mental illness (e.g. depression), and early development of chronic health conditions (e.g. cancer).<sup>1,5-8</sup>

Numerous studies have explored the health impacts and costs of specific ACEs such as child maltreatment.<sup>9-11</sup> However, the ACE framework provides a mechanism for measuring a range of ACE types and the cumulative risks they impose at a population level.<sup>2</sup> Studies using this approach show a dose response relationship between the number of ACEs suffered and poor outcomes across multiple domains, including health, criminal justice, education and employment.<sup>12-15</sup> Studies also show that most individuals who report having suffered any specific ACE type (e.g. physical abuse) also report other ACE types.<sup>16</sup> Consequently, prevention efforts focused on any individual ACE type are likely to have limited success if the range of other ACEs affecting families are left unaddressed. The rapid proliferation of awareness on the impacts of ACEs on the policy priorities of different sectors is driving multi-agency action to enhance early intervention and develop trauma-informed services.<sup>17,18</sup> However, such policy development requires an understanding of the financial costs of ACEs to society and consequently the potential gains to be made by preventing ACEs for future generations.

Estimates of the financial burden of ACEs are only just starting to emerge. A recent study estimated that the annual costs attributable to ACEs for four risk factors (smoking, alcohol use, drug use and obesity) and six causes of ill-health (anxiety, depression, cancer, diabetes,

1  
2  
3 cardiovascular disease and stroke) reached \$581 billion in Europe and \$748 billion in North  
4 America; equivalent to around 3% of each regions' GDP.<sup>12</sup> Here, we combine primary data  
5 from five ACE studies undertaken in England and Wales to develop national population  
6 attributable fractions (PAFs) for ACEs across an extended range of outcomes. We use these  
7 data to estimate the annual cost of the health burden resulting from the life-long impact of  
8 ACEs on residents of England and Wales using a modified human capital model.  
9  
10  
11  
12  
13  
14

## 15 **Methods**

### 16 **Primary data sources**

17  
18  
19 We combined data from five cross-sectional ACE studies conducted across various  
20 geographies in England and Wales between 2012 and 2017.<sup>19-23</sup> Summary information on  
21 each study is provided in online supplementary table S1. All studies used stratified random  
22 sampling approaches with lower super output area (LSOA; small geographical areas with a  
23 mean population of 1,500) as the sampling unit. LSOAs were categorised into deprivation  
24 quintiles based on their ranking in the English<sup>24</sup> or Welsh<sup>25</sup> Indexes of Multiple Deprivation  
25 (IMD); both of which are composite measures including a range of economic and social  
26 indicators. Sample selection was stratified by region (as appropriate, see online  
27 supplementary table S1) then deprivation quintile based on the population profile of the  
28 relevant study area. Households in sampled areas were identified using the national postcode  
29 address file. In four studies, randomly selected households were sent a letter prior to  
30 researcher visits that provided information on the study and the opportunity to opt out. In one  
31 study,<sup>22</sup> researchers randomly selected households in sampled LSOAs and provided study  
32 information materials at the door. Interviews were undertaken face-to-face at participants'  
33 homes by professional market research companies using computer assisted personal  
34 interviewing. Informed consent was obtained from all participants. Sensitive questions,  
35 including those on ACEs, were self-completed. Participation was voluntary and anonymous  
36 and only one resident participated per selected household (inclusion criteria: within age  
37 range, resident in the LSOA, cognitively able to participate in a face-to-face interview).  
38  
39 Across the five samples, weighted average compliance was 55.7% (see online supplementary  
40 table S1) with a total sample size of 15,658. For this study, data were restricted to individuals  
41 aged 18-69 with complete demographic and ACE data, resulting in a final sample of 15,285.  
42  
43  
44  
45  
46  
47  
48  
49  
50  
51  
52  
53  
54  
55  
56  
57  
58  
59  
60



All questionnaires used the Centers for Disease Control and Prevention short ACE tool<sup>26</sup> to collect data on nine ACEs occurring before the age of 18: physical abuse; sexual abuse; verbal abuse; parental separation; exposure to domestic violence; and household member alcohol abuse; drug abuse; mental illness; and incarceration. For the purpose of analysis, and in line with previous studies,<sup>1,19-23</sup> positive responses to ACE questions were summed and participants were allocated to an ACE count category: 0 ACEs, 1 ACE, 2-3 ACEs,  $\geq 4$  ACEs. Questions used to determine ACEs and the thirteen health outcomes analysed in this study are shown in online supplementary table S2. All studies provided data on smoking (current smoker), drug use (ever used heroin or crack cocaine) and violence (victimisation in the past year). Four studies provided data on alcohol use (current,  $\geq 12$ g per day), high body mass index (BMI,  $\geq 25.0$  kg/m<sup>2</sup>), and whether respondents had ever been diagnosed with cancer, type 2 diabetes, heart disease (coronary heart disease/heart attack), stroke or respiratory disease. One study provided data on whether respondents had ever been treated for depression, anxiety and other mental illness (see online supplementary table S3). Demographic variables included gender, age, ethnicity (self-assigned using UK census categories) and deprivation quintile.

### Calculating PAFs

Statistical analysis was undertaken in SPSS v23 with data editing and calculations undertaken in Excel. Binomial generalized linear modelling was used to calculate risk ratios (RRs) and 95% confidence intervals (CIs) associated with ACE count level for each health outcome, controlling for study sampling region, deprivation quintile of residence, gender, age and ethnicity (white or non-white). In line with cost estimates for global regions,<sup>12</sup> we calculated PAF values at each ACE count level (1 ACE v 0 ACEs; 2-3 ACEs v 0 ACEs;  $\geq 4$  ACEs v 0 ACEs) according to:

$$PAF_{ACE\alpha} = \frac{P_{ACE\alpha} \times (RR_{ACE\alpha} - 1)}{(P_{ACE0}) + (P_{ACE1} \times RR_{ACE1}) + (P_{ACE2-3} \times RR_{ACE2-3}) + (P_{ACE4+} \times RR_{ACE4+})}$$

where  $\alpha$  is the category of ACE count for the PAF in question,  $RR_{ACE}$  is the pooled RR associated with each ACE count and  $P_{ACE}$  is the proportion of the sample exposed to each ACE count. Overall PAFs for ACEs were generated by summing the three PAF values.<sup>27</sup> Separate PAFs were generated for England and Wales using regional ACE prevalence levels.

### Calculating ACE-attributable costs

Consistent with previous studies,<sup>11,12,28</sup> we used a modified human capital approach to calculate ACE-attributable costs associated with each health outcome. The human capital approach is a commonly used method in economic evaluations to calculate the cost of lost productivity to society as a result of separation of an individual from the labour force due to premature death or morbidity.<sup>29</sup> Health outcomes were matched to risk factor and cause categories in the 2017 Global Burden of Disease Study<sup>30</sup> (GBD; see online supplementary table S4). For each matched category, disability adjusted life years (DALY) estimates were extracted for England and Wales for age categories 15-49 years, 50-69 years and 70+ years. Previous cost estimates using a human capital approach have assumed one DALY is equal to a regions' GDP per capita and calculated costs based on DALYs\*GDP per capita.<sup>11,12,28</sup> GDP is not calculated separately for England and Wales, thus we used the related measure of regional Gross Value Added (GVA; equivalent to GDP plus subsidies less taxes on products) with GVA per capita (balanced, current basic 2017 prices) being £28,096 for England and £19,899 for Wales.<sup>31</sup> PAFs were applied to the total cost (by UK region) for each risk factor and cause to estimate the economic value of DALYs by ACE level. The equivalent value of DALYs as a proportion of total GVA was also calculated. To estimate the total costs attributed to ACEs across all health outcomes studied, we excluded DALYs for risk factors that related to included causes of ill-health (e.g. those for alcohol use attributed to cancer). Sensitivity analyses were run limiting DALYs to those for 15-69 year olds; using the upper and lower bounds (uncertainty intervals) for DALYs (extracted from the GBD); and by generating PAFs using the upper and lower confidence intervals for RRs.

### Patient and Public Involvement

Patients and the public were not involved in the design or planning of the study.

### Results

Demographics and ACE count levels of the individual and combined study samples are shown in online supplementary table S5. Across the combined samples, over half (54.9%) of participants were female and 85.7% were of white ethnicity. ACE prevalence levels (used to generate PAFs) were 53.1% 0 ACEs, 19.0% 1 ACE, 15.2% 2-3 ACEs and 12.6%  $\geq 4$  ACEs in Welsh samples, and 56.2% 0 ACEs, 20.1% 1 ACE, 15.4% 2-3 ACEs and 8.4%  $\geq 4$  ACEs in English samples.

1  
2  
3  
4  
5 RRs for each ACE count level and each health outcome are presented in table 1 (unadjusted  
6 proportions are provided in online supplementary table S6). All outcomes showed a graded  
7 relationship with ACEs, with RRs increasing as ACE count increased. Risks of alcohol use,  
8 smoking, drug use, violence and mental illness outcomes were increased in individuals with  
9 any level of ACEs. Risks of high BMI, heart disease and respiratory disease were increased  
10 in individuals with  $\geq 2$  ACEs, and risks of type 2 diabetes, cancer and stroke in those with  $\geq 4$   
11 ACEs only.  
12  
13  
14  
15  
16  
17  
18

19 Total PAFs for ACEs were slightly higher in Wales than in England for all outcomes due to  
20 higher ACE prevalence levels (table 2). Across the four risk factors, drug use had the highest  
21 PAFs due to ACEs (58.8% Wales, 52.6% England). However, smoking carried the highest  
22 ACE-attributable costs given higher numbers of DALYs for this risk factor. ACE-attributable  
23 costs due to smoking were £7.4 billion in England and £466.5 million in Wales. High BMI  
24 had the lowest PAFs due to ACEs (2.4% Wales, 2.2% England), although ACE-attributable  
25 costs still reached £729.2 million in England and £35.3 million in Wales. Across causes of ill-  
26 health, violence and mental illness had the highest PAFs due to ACEs while cancer and type  
27 2 diabetes had the lowest. ACEs were attributed to 48.9% of recent violence victimisation in  
28 Wales and 43.4% in England, with associated costs of £16.6 million and £355.0 million  
29 respectively. Up to a third of depression and anxiety, and almost half of other mental  
30 illnesses, were attributed to ACEs with associated costs across the three mental health  
31 outcomes being £465.3 million in Wales and £10.7 billion in England. Despite having low  
32 PAFs, high DALYs for cancer meant that this cause carried the greatest ACE-attributable  
33 costs across all individual outcomes measured; reaching £476.4 million in Wales and £7.5  
34 billion in England.  
35  
36  
37  
38  
39  
40  
41  
42  
43  
44  
45  
46  
47

48 Across all nine causes of ill-health, total ACE-attributable costs were £33.9 billion (£1.7  
49 billion for Wales and £32.1 billion for England). To calculate a total ACE-attributable cost  
50 across all risk factors and causes of ill-health, we excluded DALYs from the four risk factors  
51 that related to included causes (e.g. those for smoking related to cancer). Total ACE-  
52 attributable costs were £42.8 billion (£2.2 billion for Wales and £40.6 billion for England;  
53 table 3). These costs are equivalent to 3.5% of total annual GVA in Wales and 2.6% in  
54 England (2.6% across the combined geographies). In sensitivity analysis (see methods)  
55  
56  
57  
58  
59  
60

1  
2  
3 combined estimated ACE-attributable costs for England and Wales ranged from £16.3 billion  
4 (equivalent to 1.0% of GVA) to £68.4 billion (4.2% of GVA; table 3).  
5  
6  
7

8  
9 Figure 1 shows the proportion of ACE-attributable costs for each outcome that were  
10 accounted for by 1, 2-3 and  $\geq 4$  ACEs. For cancer, the 1 ACE category accounted for only  
11 1.7% of ACE-attributable financial costs while the  $\geq 4$  ACEs category accounted for 84.2%.  
12 For other outcomes, the proportion of costs accounted for by the 1 ACE category ranged from  
13 9.9% (violence) to 28.1% (high BMI), while the proportion accounted for by  $\geq 4$  ACEs  
14 ranged from 28.9% (high BMI) to 58.6% (drug use).  
15  
16  
17  
18  
19

## 20 Discussion

21  
22 In this study of 15,285 adults in England and Wales, we found a dose-response relationship  
23 between ACEs and all outcomes measured. Violence, mental illness and drug use had the  
24 highest PAFs due to ACEs, while mental illness, cancer and smoking carried the highest  
25 ACE-attributable costs. Across all outcomes studied, the total estimated annual ACE-  
26 attributable costs across England and Wales were £42.8 billion, equivalent to 2.6% of total  
27 GVA in England and Wales and representing approximately £1,800 per household per  
28 annum.<sup>32</sup> The majority of these costs related to multiple ACE categories.  
29  
30  
31  
32  
33  
34  
35

## 36 Comparison with other studies

37  
38 There are no previous studies estimating the costs of ACEs in England and Wales. However,  
39 a study that generated PAFs for ACEs through meta-analyses of risk estimates in published  
40 literature estimated the annual costs of ACEs to be equivalent to 2.7% of GDP in Europe and  
41 3.6% of GDP in North America.<sup>12</sup> Other studies have measured the costs of specific ACEs,  
42 particularly violence against children using similar human capital approaches. Such costs  
43 have been estimated to be equivalent to between 1.2% and 3.5% of sub-regional GDP in East  
44 Asia and the Pacific;<sup>11</sup> to 4.3% of GDP in South Africa;<sup>33</sup> and to 0.8% of GDP for physical  
45 abuse, 0.5% for emotional abuse and 0.4% for sexual abuse in China.<sup>34</sup> In the UK, the  
46 lifetime cost per victim of non-fatal child maltreatment by a primary caregiver has  
47 conservatively been estimated at £90,000.<sup>35</sup> However, this estimate excluded costs for several  
48 outcomes considered in our study, including those for cancer, type 2 diabetes and heart  
49 disease, due to no association being found between these conditions and the study's single  
50 measure of child maltreatment. We found no associations between such conditions and the  
51 single ACE category, yet strong associations with multiple ACEs. Thus 98.3% of the ACE-  
52  
53  
54  
55  
56  
57  
58  
59  
60

1  
2  
3 attributable costs of cancer, 87.6% of those for heart disease and 76.3% of those for type 2  
4 diabetes were accounted for by suffering more than one type of ACE.  
5  
6  
7

### 8 **Strengths and weaknesses of the study**

9  
10 We used an established methodology<sup>11,12,28</sup> and based our approach on that used to estimate  
11 the financial burden of ACEs across Europe and North America.<sup>12</sup> An acknowledged  
12 limitation of this previous study was the lack of consistency in study methodologies. Key  
13 strengths of the current study are the use of primary data and consistency in study  
14 methodologies, with all studies using representative household samples and the same set of  
15 questions to measure ACEs. However not all outcomes were measured in all studies, and  
16 mental illness was only measured in Wales,<sup>23</sup> while some outcome measures could not be  
17 matched directly to GBD categories (see online supplementary table S4). Like previous ACE  
18 studies, the retrospective, self-reported nature of questions makes findings subject to recall  
19 issues and any reluctance to report historical experiences. Further, some population groups  
20 who may be at increased exposure to ACEs (e.g. those incarcerated<sup>36</sup> or homeless<sup>37</sup>) will have  
21 been underrepresented and we could not account for individuals that had died prematurely  
22 through conditions related to ACEs. These biases may have led to reduced relative risks.  
23 Conversely, while ACEs made an overall significant contribution to GLMs for all outcomes,  
24 for some, RRs were not significant at all ACE levels. Further, our samples were restricted to  
25 adults aged 18-69 years, yet some conditions such as stroke occur predominantly in older age  
26 groups. Consequently sensitivity analyses were undertaken limiting DALYs to the 15-69 year  
27 age group and using lower and upper CIs for RRs. While we excluded DALYs for risk  
28 factors linked to included causes of ill-health in calculating our overall cost estimates, it is  
29 beyond the ability of this study to calculate the actual burden of ACEs due to multiplicative  
30 relationships. However, our estimates of the costs of ACEs are likely to be conservative.  
31 Whilst we included many key risks for, and causes of, ill-health associated with ACEs we did  
32 not account for other associated outcomes (e.g. risky sexual behaviour, suicide, crime), nor  
33 for the burden of child deaths related to ACEs. A study of child death reviews in an English  
34 locality found evidence of at least one ACE in the records of 63% of children that died over a  
35 four-year period, and of at least four ACEs in 20% of cases.<sup>38</sup> The lifetime cost of a child  
36 maltreatment death in the UK has been estimated at almost £1 million.<sup>35</sup>  
37  
38  
39  
40  
41  
42  
43  
44  
45  
46  
47  
48  
49  
50  
51  
52  
53  
54  
55  
56  
57

### 58 **Meaning of the study**

1  
2  
3 Nearly half of all adults in England and Wales experienced some form of ACE as a child and  
4 around one in 10 experienced  $\geq 4$  ACEs (see online supplementary table S5). This equates to  
5 approximately 20 million adults with any ACE and four million with  $\geq 4$  ACEs. Our results  
6 quantify the substantive proportion of common health-harming behaviours and long-term  
7 health conditions that are associated with ACEs, and consequently that could be avoided in  
8 future generations through offering better quality childhoods. Currently however, an  
9 estimated 2.3 million children in England live in families with substantial complex needs and  
10 only a third of these children are receiving established support from statutory services.<sup>39</sup> An  
11 imperative to increase expenditure on safe and nurturing childhoods is emphasised by  
12 findings that around a third of mental illness could be avoided if ACEs were either prevented  
13 or their impacts moderated through early intervention. Mental illness carries one of the  
14 highest costs to health systems in England and Wales<sup>40</sup> and also creates substantial pressure  
15 on educational, social and criminal justice systems. For the latter in particular, strong  
16 relationships found here between ACEs and violence are an additional concern with many  
17 types of police recorded violence increasing in England and Wales.<sup>41</sup> Across all measured  
18 outcomes, we identify potentially avoidable costs from ACEs equivalent to more than a  
19 quarter of the UK's annual government healthcare expenditure.<sup>42</sup> The potential to avoid such  
20 costs is unrealised whilst the majority of health expenditure focuses on adults who have  
21 already developed pathologies. Evidence-based mechanisms to prevent ACEs and build  
22 resilience to their long-term harms are available, offering return on investments in years  
23 rather than decades through benefits on child development, health and education.<sup>43-46</sup> The  
24 benefits of such interventions reach across sectors, and a whole of government approach  
25 could more immediately resource interventions capable of diminishing a current annual ACE  
26 burden of almost £43 billion.

### 46 **Unanswered questions and future research**

47  
48 As with most ACE studies our data were collected retrospectively and consequently provide  
49 no information on the current levels of ACEs experienced by children in England and Wales.  
50 Options to measure ACE prevalence now form part of the international Health Behaviour in  
51 School-aged children survey (HSBC)<sup>47</sup> but have not yet been used in the English or Welsh  
52 survey iterations. Nor are such data routinely being collected through other major school-  
53 based surveys in the UK. While estimates of current exposure to some ACEs are available,<sup>39</sup>  
54 routine measurement of ACEs in children is required to better understand their extent and  
55 socio-demographic and geographic distribution, as well as the impact of interventions to  
56  
57  
58  
59  
60

1  
2  
3 address them. Further, our findings identified that, despite having the lowest prevalence, the  
4 majority of costs generated by ACEs fall on those experiencing  $\geq 4$  ACEs (table 2). There is  
5 an urgent need to better understand the cumulative impact of ACEs on health outcomes  
6 across the life course, integrating epidemiology with fields including epigenetics,  
7 immunology and neurology. Equally, there is a critical need for knowledge on how services  
8 can become more trauma-informed, what impact trauma-informed service delivery can have,  
9 and how services for children and families affected by child maltreatment, substance abuse,  
10 domestic violence or incarceration, for instance, can be better integrated to provide a  
11 cohesive offer. Finally, as well as the core ACE categories included here, measurements of  
12 other childhood adversities such as neglect, parental bereavement, bullying and exposure to  
13 community level violence are increasingly being incorporated into the list of potential ACEs.  
14 Public services that recognise the impacts of childhood adversity on lifelong health but  
15 neglect to implement preventative measures may yet feature in future lists.

### 26 27 **Acknowledgements**

28 We would like to thank all those involved in developing and implementing the individual  
29 studies that contributed to this study, and the English and Welsh residents who participated in  
30 the surveys.  
31  
32  
33  
34  
35

### 36 37 **Author Contributions**

38 MAB and KH designed the study. MAB developed the statistical modelling and KH, KF and  
39 CS conducted data analyses. KH wrote the manuscript with contributions from MAB, KF and  
40 RK. All authors reviewed the study findings and read and approved the final version before  
41 submission. The corresponding author attests that all listed authors meet authorship criteria  
42 and that no others meeting the criteria have been omitted.  
43  
44  
45  
46  
47

### 48 49 **Funding**

50 This research received no specific grant from any funding agency in the public, commercial  
51 or not-for-profit sectors.  
52  
53  
54

### 55 56 **Competing interests**

57 All authors have completed the ICMJE uniform disclosure form at  
58 [www.icmje.org/coi\\_disclosure.pdf](http://www.icmje.org/coi_disclosure.pdf) and declare: no support from any organisation for the  
59 submitted work; no financial relationships with any organisations that might have an interest  
60

1  
2  
3 in the submitted work in the previous three years; no other relationships or activities that  
4 could appear to have influenced the submitted work.  
5  
6  
7

### 8 **Ethics approval**

9  
10 Ethical approval for the 2017 Welsh national sample was obtained from Bangor University's  
11 Healthcare and Medical Sciences Ethics Committee (BU230317) with ethical approval for all  
12 other studies obtained through Liverpool John Moores University Research Ethics Panel  
13 (12/HEA/016; 13/HEA/052; 14/EHC/008; 14/EHC/0087). Additional approval for both  
14 Welsh surveys was provided by Public Health Wales Research and Development Office.  
15  
16  
17  
18

### 19 **Data sharing**

20 The datasets analysed in the current study are available from the corresponding author on  
21 reasonable request.  
22  
23  
24  
25  
26

### 27 **References**

- 28  
29  
30  
31 1 Hughes K, Bellis MA, Hardcastle KA, et al. The impact of multiple adverse  
32 childhood experiences on health: a systematic review and meta-analysis. *Lancet*  
33 *Public Health* 2017;2:e356-66.  
34  
35 36 2 Anda RF, Butchart A, Felitti VJ, Brown DW. Building a framework for global  
37 surveillance of the public health implications of adverse childhood experiences. *Am J*  
38 *Prev Med* 2010;39:93-8.  
39  
40 41 3 Berens AE, Jensen SKG, Nelson CA. Biological embedding of childhood adversity:  
42 from physiological mechanisms to clinical implications. *BMC Medicine* 2017;15:135.  
43  
44 45 4 Teicher MH, Samson JA, Anderson CM, Ohashi K. The effects of child maltreatment  
46 on brain structure, function and connectivity. *Nat Rev Neurosci* 2016;17:652-66.  
47  
48 49 5 Oh DL, Jerman P, Marquez SS, et al. Systematic review of pediatric health outcomes  
50 associated with childhood adversity. *BMC Pediatr* 2018;18:83.  
51  
52 53 6 Jimenez ME, Wade Jr R, Lin Y, Morrow LM, Reichman NE. Adverse experiences in  
54 early childhood and kindergarten outcomes. *Pediatrics* 2016;137:e20151839.  
55  
56 57 7 Bright M, Thompson LA. Association of adverse childhood experiences with co-  
58 occurring health conditions in early childhood. *J Dev Behav Pediatr* 2018;39:37-45.  
59  
60



- 1  
2  
3 8 Holman DM, Ports KA, Duchanan ND, et al. The association between adverse  
4 childhood experiences and risk of cancer in adulthood: a systematic review of the  
5 literature. *Pediatrics* 2016;138:S81-S91.  
6  
7  
8 9 Norman RE, Byambaa M, De R, Butchart A, Scott J, Vos T. The long-term health  
9 consequences of child physical abuse, emotional abuse, and neglect: a systematic  
10 review and meta-analysis. *PLOS Med* 2012;9:e1001349.  
11  
12  
13 10 Peterson C, Florence C, Klevens J. The economic burden of child maltreatment in the  
14 United States, 2015. *Child Abuse Negl* 2018;86:178-83.  
15  
16  
17 11 Fang X, Fry DA, Brown DS, et al. The burden of child maltreatment in the East Asia  
18 and Pacific region. *Child Abuse Negl* 2015;42:146-62.  
19  
20  
21 12 Bellis MA, Hughes K, Ford K, Ramos Rodriguez G, Sethi D, Passmore J. Life course  
22 health consequences and associated annual costs of adverse childhood experiences  
23 across Europe and North America: a meta-analysis. *Lancet Public Health*  
24 2019;4:e517-28.  
25  
26  
27 13 Baglivio MT, Epps N, Swartz K, Sayedul Huq M, Sheer A, Hardt NS. The prevalence  
28 of adverse childhood experiences (ACE) in the lives of juvenile offenders. *J Juv*  
29 *Justice* 2014;3:12-34.  
30  
31  
32 14 Metzler M, Merrick MT, Klevens J, Ports KA, Ford DC. Adverse childhood  
33 experiences and life opportunities: shifting the narrative. *Child Youth Serv Rev*  
34 2017;72:141-9.  
35  
36  
37 15 Hardcastle K, Bellis MA, Ford K, Hughes K, Garner J, Ramos Rodriguez G.  
38 Measuring the relationships between adverse childhood experiences and educational  
39 and employment success in England and Wales: findings from a retrospective study.  
40 *Public Health* 2018;165:106-16.  
41  
42  
43 16 Hughes K, Bellis MA, Sethi D, et al. Adverse childhood experiences, childhood  
44 relationships and associated substance use and mental health in young Europeans. *Eur*  
45 *J Public Health* 2019;29:741-7.  
46  
47  
48 17 Pachter LM, Lieberman L, Bloom SL, Fein JA. Developing a community-wide  
49 initiative to address childhood adversity and toxic stress: a case study of the  
50 Philadelphia ACE Task Force. *Acad Pediatr* 2017;17:S130-5.  
51  
52  
53 18 Science and Technology Select Committee. Evidence-based early years intervention.  
54 UK Parliament 2018;  
55 <https://publications.parliament.uk/pa/cm201719/cmselect/cmsctech/506/50602.htm>  
56 (accessed 30 September 2019).  
57  
58  
59  
60

- 1  
2  
3 19 Bellis MA, Hughes K, Leckenby N, Hardcastle K, Perkins C, Lowey H. Measuring  
4 mortality and the burden of adult disease associated with Adverse Childhood  
5 Experiences in England: a national survey. *J Public Health* 2015;37:445-54.  
6  
7  
8 20 Bellis MA, Lowey H, Leckenby N, Hughes K, Harrison D. Adverse childhood  
9 experiences: retrospective study to determine their impact on adult health behaviours  
10 and health outcomes in a UK population. *J Public Health* 2014;36:81-91.  
11  
12 21 Ford K, Butler N, Hughes K, Quigg Z, Bellis MA. Adverse childhood experiences in  
13 Hertfordshire, Luton and Northamptonshire. Liverpool: Centre for Public Health,  
14 Liverpool John Moores University, 2016.  
15  
16 [https://www.researchgate.net/publication/302589403\\_Adverse\\_Childhood\\_Experiences\\_ACEs\\_in\\_Hertfordshire\\_Luton\\_and\\_Northamptonshire](https://www.researchgate.net/publication/302589403_Adverse_Childhood_Experiences_ACEs_in_Hertfordshire_Luton_and_Northamptonshire) (accessed 16 October  
17 2019).  
18  
19 22 Bellis MA, Ashton K, Hughes K, Ford K, Bishop J, Paranjothy S. Adverse childhood  
20 experiences and their impact on health-harming behaviours in the Welsh population.  
21 Cardiff: Public Health Wales, 2016.  
22  
23 [https://www.researchgate.net/publication/290433553\\_Adverse\\_Childhood\\_Experiences\\_and\\_their\\_impact\\_on\\_health-harming\\_behaviours\\_in\\_the\\_Welsh\\_adult\\_population](https://www.researchgate.net/publication/290433553_Adverse_Childhood_Experiences_and_their_impact_on_health-harming_behaviours_in_the_Welsh_adult_population) (accessed 16 October 2019).  
24  
25 23 Hughes K, Ford K, Davies AR, Homolova L, Bellis MA. Sources of resilience and  
26 their moderating relationships with harms from adverse childhood experiences.  
27 Wrexham: Public Health Wales, 2018.  
28  
29 [https://www.researchgate.net/publication/322697404\\_Sources\\_of\\_resilience\\_and\\_their\\_moderating\\_relationships\\_with\\_harms\\_from\\_adverse\\_childhood\\_experiences\\_Report\\_1\\_Mental\\_Illness](https://www.researchgate.net/publication/322697404_Sources_of_resilience_and_their_moderating_relationships_with_harms_from_adverse_childhood_experiences_Report_1_Mental_Illness) (accessed 16 October 2019).  
30  
31 24 Ministry of Housing, Communities & Local Government. English indices of  
32 deprivation. <https://www.gov.uk/government/collections/english-indices-of-deprivation>  
33 (accessed 17 October 2019).  
34  
35 25 Stats Wales. Welsh Index of Multiple Deprivation.  
36 <https://statswales.gov.wales/Catalogue/Community-Safety-and-Social-Inclusion/Welsh-Index-of-Multiple-Deprivation> (accessed 17 October 2019).  
37  
38 26 Centers for Disease Control and Prevention. BRFSS ACE Module.  
39 <https://www.cdc.gov/violenceprevention/childabuseandneglect/acestudy/ace-brfss.html> (accessed 30 September 2019).  
40  
41  
42  
43  
44  
45  
46  
47  
48  
49  
50  
51  
52  
53  
54  
55  
56  
57  
58  
59  
60

- 1  
2  
3 27 Barendregt JJ, Veerman JL. Categorical versus continuous risk factors and the  
4 calculation of potential impact fractions. *J Epidemiol Community Health*  
5 2010;64:209-12.  
6  
7  
8 28 Brown DW. Economic value of disability-adjusted life years lost to violence:  
9 estimate for WHO Member States. *Pan Am J Public Health* 2008;24:203-9.  
10  
11 29 Pike J, Grosse SD. Friction cost estimates of productivity costs in cost-of-illness  
12 studies in comparison with human capital estimates: a review. *Appl Health Econ*  
13 *Health Policy* 2018;16:765-78.  
14  
15  
16  
17 30 Institute for Health Metrics and Evaluation. Global burden of disease 2017.  
18 <http://ghdx.healthdata.org/gbd-results-tool> (accessed 25 February 2019).  
19  
20 31 Office for National Statistics. Nominal regional gross value added (balanced) per head  
21 and income components.  
22 <https://www.ons.gov.uk/economy/grossvalueaddedgva/datasets/nominalregionalgross>  
23 [valueaddedbalancedperheadandincomecomponents](https://www.ons.gov.uk/economy/grossvalueaddedgva/datasets/nominalregionalgross) (accessed 17 October 2019).  
24  
25  
26 32 Office for National Statistics. Number of households by local and unitary authorities  
27 in England and Wales, and total number of households in Northern Ireland, 2004 to  
28 2017.  
29 <https://www.ons.gov.uk/peoplepopulationandcommunity/birthsdeathsandmarriages/families/adhocs/010265numberofhouseholdsbylocalandunitaryauthoritiesinenglandand>  
30 [walesandtotalnumberofhouseholdsinnorthernireland2004to2017](https://www.ons.gov.uk/peoplepopulationandcommunity/birthsdeathsandmarriages/families/adhocs/010265numberofhouseholdsbylocalandunitaryauthoritiesinenglandand) (accessed 11 October  
31 2019).  
32  
33  
34 33 Fang X, Zheng X, Fry DA, et al. The economic burden of violence against children in  
35 South Africa. *Int J Environ Res Public Health* 2017;14:E1431.  
36  
37 34 Fang X, Fry DA, Ji K, et al. The burden of child maltreatment in China: a systematic  
38 review. *Bull World Health Organ* 2015;93:176-85C.  
39  
40 35 Conti G, Morris S, Melnychuk M, Pizzo E. The economic costs of child maltreatment  
41 in the UK. London: NSPCC and University College London, 2017.  
42 [https://learning.nspcc.org.uk/research-resources/2017/economic-cost-child-](https://learning.nspcc.org.uk/research-resources/2017/economic-cost-child-maltreatment/)  
43 [maltreatment/](https://learning.nspcc.org.uk/research-resources/2017/economic-cost-child-maltreatment/) (accessed 17 October 2019).  
44  
45  
46 36 Ford K, Newbury A, Barton E, et al. Understanding the prevalence of adverse  
47 childhood experiences (ACEs) in a male offender population in Wales: The Prisoner  
48 ACE Survey. Wrexham: Public Health Wales NHS Trust, Bangor University, 2019.  
49 <https://www.bangor.ac.uk/news/documents/PHW-Prisoner-ACE-Survey-Report-E.pdf>  
50 (accessed 17 October 2019).  
51  
52  
53  
54  
55  
56  
57  
58  
59  
60

- 1  
2  
3  
4 37 Sundin EC, Baguley T. Prevalence of childhood abuse among people who are  
5 homeless in Western countries: a systematic review and meta-analysis. *Soc Psychiatry*  
6 *Psychiatr Epidemiol* 2015;50:183–94.  
7  
8  
9 38 Grey HR, Ford K, Bellis MA, Lowey H, Wood S. Associations between childhood  
10 deaths and adverse childhood experiences: an audit of data from a child death  
11 overview panel. *Child Abuse Negl* 2019;90:22-31.  
12  
13 39 Children’s Commissioner for England. Childhood vulnerability in numbers. London:  
14 Children’s Commissioner, 2019.  
15  
16 [https://www.childrenscommissioner.gov.uk/publication/childhood-vulnerability-in-](https://www.childrenscommissioner.gov.uk/publication/childhood-vulnerability-in-england-2019/)  
17 [england-2019/](https://www.childrenscommissioner.gov.uk/publication/childhood-vulnerability-in-england-2019/) (accessed 17 October 2019).  
18  
19  
20 40 Mental Health Taskforce to the NHS in England. The five year forward view for  
21 mental health. NHS England, 2016. [https://www.england.nhs.uk/wp-](https://www.england.nhs.uk/wp-content/uploads/2016/02/Mental-Health-Taskforce-FYFV-final.pdf)  
22 [content/uploads/2016/02/Mental-Health-Taskforce-FYFV-final.pdf](https://www.england.nhs.uk/wp-content/uploads/2016/02/Mental-Health-Taskforce-FYFV-final.pdf) (accessed 17  
23 October 2019).  
24  
25  
26 41 Office for National Statistics. Crime in England and Wales: year ending June 2019.  
27 [https://www.ons.gov.uk/peoplepopulationandcommunity/crimeandjustice/bulletins/crimeinenglandandwales/yearendingjune2019#rise-in-offences-involving-knives-or-](https://www.ons.gov.uk/peoplepopulationandcommunity/crimeandjustice/bulletins/crimeinenglandandwales/yearendingjune2019#rise-in-offences-involving-knives-or-sharp-instruments-and-firearms-offences)  
28 [sharp-instruments-and-firearms-offences](https://www.ons.gov.uk/peoplepopulationandcommunity/crimeandjustice/bulletins/crimeinenglandandwales/yearendingjune2019#rise-in-offences-involving-knives-or-sharp-instruments-and-firearms-offences) (accessed 21 October 2019).  
29  
30  
31  
32 42 Office for National Statistics. Healthcare expenditure, UK health accounts: 2017.  
33 <https://www.ons.gov.uk/peoplepopulationandcommunity/healthandsocialcare/healthcaresystem/bulletins/ukhealthaccounts/2017>. (accessed 14 October 2019).  
34  
35  
36  
37 43 Britto PR, Lye SJ, Proulx K, et al. Nurturing care: promoting early childhood  
38 development. *Lancet* 2017;389:91-102.  
39  
40  
41  
42 44 Gardner F, Leijten P, Mann J, et al. Could scale up of parenting programmes improve  
43 child disruptive behaviour and reduce social inequalities? Using individual participant  
44 data meta-analysis to establish for whom programmes are effective and cost-effective.  
45 *Public Health Research* 2017;5:10.  
46  
47 <https://www.ncbi.nlm.nih.gov/books/NBK469806/> (accessed 17 October 2019).  
48  
49  
50 45 Ramon I, Chattopadhyay SK, Barnett WS, Hahn RA. Early childhood education to  
51 promote health equity: a community guide economic review. *J Public Health Manag*  
52 *Pract* 2018;24:e8-15.  
53  
54  
55 46 Boparai SKP, Au V, Koita K, et al. Ameliorating the biological impacts of childhood  
56 adversity: a review of intervention programs. *Child Abuse Negl* 2018;81:82-105.  
57  
58  
59  
60

1  
2  
3 47 Health Behaviour in School-aged Children: World Health Organization collaborative  
4 cross national survey. <http://www.hbsc.org/index.aspx> (accessed 14 October 2019).  
5  
6  
7  
8  
9  
10  
11  
12  
13  
14  
15  
16  
17  
18  
19  
20  
21  
22  
23  
24  
25  
26  
27  
28  
29  
30  
31  
32  
33  
34  
35  
36  
37  
38  
39  
40  
41  
42  
43  
44  
45  
46  
47  
48  
49  
50  
51  
52  
53  
54  
55  
56  
57  
58  
59  
60

For peer review only

1  
2  
3 **Figure 1: Proportion of ACE-attributable costs for each risk factor and cause of ill-**  
4 **health attributed to 1, 2-3 and  $\geq 4$  ACE categories**  
5  
6

7 ACE, adverse childhood experience' BMI, body mass index.  
8  
9  
10  
11  
12  
13  
14  
15  
16  
17  
18  
19  
20  
21  
22  
23  
24  
25  
26  
27  
28  
29  
30  
31  
32  
33  
34  
35  
36  
37  
38  
39  
40  
41  
42  
43  
44  
45  
46  
47  
48  
49  
50  
51  
52  
53  
54  
55  
56  
57  
58  
59  
60

For peer review only

**Table 1: Risk ratios for risk factors and causes of ill-health at each ACE count level**

|                             | 1 ACE |             |        | 2-3 ACEs |             |        | ≥4 ACEs |              |        |
|-----------------------------|-------|-------------|--------|----------|-------------|--------|---------|--------------|--------|
|                             | RR    | 95%CIs      | P      | RR       | 95%CIs      | P      | RR      | 95%CIs       | P      |
| <b>Risk factors</b>         |       |             |        |          |             |        |         |              |        |
| Alcohol use                 | 1.164 | 1.041-1.301 | 0.008  | 1.311    | 1.165-1.475 | <0.001 | 1.837   | 1.631-2.069  | <0.001 |
| Smoking                     | 1.188 | 1.091-1.293 | <0.001 | 1.448    | 1.329-1.578 | <0.001 | 2.079   | 1.904-2.270  | <0.001 |
| Drug use                    | 1.648 | 1.168-2.327 | 0.005  | 3.184    | 2.342-4.330 | <0.001 | 8.685   | 6.658-11.328 | <0.001 |
| High BMI                    | 1.031 | 0.986-1.078 | 0.177  | 1.062    | 1.012-1.115 | 0.015  | 1.075   | 1.011-1.142  | 0.020  |
| <b>Causes of ill-health</b> |       |             |        |          |             |        |         |              |        |
| Depression                  | 1.560 | 1.305-1.865 | <0.001 | 2.137    | 1.820-2.509 | <0.001 | 2.766   | 2.374-3.223  | <0.001 |
| Anxiety                     | 1.429 | 1.169-1.747 | <0.001 | 2.151    | 1.806-2.563 | <0.001 | 2.751   | 2.316-3.266  | <0.001 |
| Other mental illness        | 1.684 | 1.008-2.812 | 0.046  | 3.216    | 2.083-4.964 | <0.001 | 5.115   | 3.356-7.796  | <0.001 |
| Violence                    | 1.383 | 1.107-1.728 | 0.004  | 2.955    | 2.448-3.566 | <0.001 | 5.625   | 4.745-6.667  | <0.001 |
| Cancer                      | 1.009 | 0.800-1.273 | 0.937  | 1.101    | 0.854-1.419 | 0.459  | 2.078   | 1.588-2.720  | <0.001 |
| Type 2 diabetes             | 1.157 | 0.958-1.398 | 0.131  | 1.223    | 0.995-1.503 | 0.056  | 1.782   | 1.400-2.268  | <0.001 |
| Heart disease               | 1.102 | 0.836-1.453 | 0.492  | 1.415    | 1.072-1.868 | 0.014  | 1.928   | 1.366-2.722  | <0.001 |
| Stroke                      | 1.238 | 0.800-1.918 | 0.338  | 1.427    | 0.906-2.250 | 0.125  | 2.705   | 1.660-4.409  | <0.001 |
| Respiratory disease         | 1.224 | 0.927-1.615 | 0.155  | 1.806    | 1.383-2.358 | <0.001 | 2.612   | 1.929-3.536  | <0.001 |

Analysis uses generalized linear modelling controlling for study sampling region, deprivation quintile, age, gender and ethnicity. Reference category = 0 ACEs. ACE, adverse childhood experience; RR, risk ratio; CI, confidence interval.

**Table 2: Population attributable fractions and DALYs and costs attributable to ACEs**

|                      |         | Population attributable fraction |          |         |          | Total DALYs (age 15+) | DALYs attributable to ACEs |          |         |          | Total estimated cost (£ million)* | Attributable costs by ACE count (£ million) |          |         |          |
|----------------------|---------|----------------------------------|----------|---------|----------|-----------------------|----------------------------|----------|---------|----------|-----------------------------------|---------------------------------------------|----------|---------|----------|
|                      |         | 1 ACE                            | 2-3 ACEs | ≥4 ACEs | All ACEs |                       | 1 ACE                      | 2-3 ACEs | ≥4 ACEs | All ACEs |                                   | 1 ACE                                       | 2-3 ACEs | ≥4 ACEs | All ACEs |
| Alcohol use          | Wales   | 0.026                            | 0.040    | 0.089   | 0.156    | 38114                 | 999                        | 1527     | 3404    | 5929     | 758.4                             | 19.9                                        | 30.4     | 67.7    | 118.0    |
|                      | England | 0.029                            | 0.042    | 0.061   | 0.131    | 606086                | 17297                      | 25199    | 36972   | 79467    | 17028.6                           | 486.0                                       | 708.0    | 1038.8  | 2232.7   |
| Smoking              | Wales   | 0.029                            | 0.055    | 0.110   | 0.194    | 121011                | 3474                       | 6663     | 13307   | 23444    | 2408.0                            | 69.1                                        | 132.6    | 264.8   | 466.5    |
|                      | England | 0.031                            | 0.058    | 0.076   | 0.165    | 1590656               | 50082                      | 91530    | 120314  | 261926   | 44691.1                           | 1407.1                                      | 2571.6   | 3380.3  | 7359.1   |
| Drug use             | Wales   | 0.051                            | 0.137    | 0.400   | 0.588    | 22518                 | 1140                       | 3090     | 9011    | 13241    | 448.1                             | 22.7                                        | 61.5     | 179.3   | 263.5    |
|                      | England | 0.062                            | 0.159    | 0.306   | 0.526    | 331956                | 20459                      | 52832    | 101413  | 174704   | 9326.6                            | 574.8                                       | 1484.4   | 2849.3  | 4908.5   |
| High BMI             | Wales   | 0.006                            | 0.009    | 0.009   | 0.024    | 73423                 | 422                        | 677      | 677     | 1775     | 1461.0                            | 8.4                                         | 13.5     | 13.5    | 35.3     |
|                      | England | 0.006                            | 0.009    | 0.006   | 0.022    | 1203925               | 7346                       | 11219    | 7388    | 25954    | 33825.5                           | 206.4                                       | 315.2    | 207.6   | 729.2    |
| Depression           | Wales   | 0.071                            | 0.115    | 0.149   | 0.335    | 16161                 | 1142                       | 1865     | 2401    | 5407     | 321.6                             | 22.7                                        | 37.1     | 47.8    | 107.6    |
|                      | England | 0.078                            | 0.122    | 0.103   | 0.303    | 294592                | 23073                      | 35890    | 30416   | 89379    | 8276.9                            | 648.3                                       | 1008.4   | 854.6   | 2511.2   |
| Anxiety              | Wales   | 0.055                            | 0.119    | 0.150   | 0.324    | 12434                 | 684                        | 1477     | 1861    | 4023     | 247.4                             | 13.6                                        | 29.4     | 37.0    | 80.0     |
|                      | England | 0.061                            | 0.126    | 0.104   | 0.291    | 203872                | 12452                      | 25606    | 21239   | 59297    | 5728.0                            | 349.9                                       | 719.4    | 596.7   | 1666.0   |
| Other mental illness | Wales   | 0.065                            | 0.170    | 0.262   | 0.497    | 28076                 | 1832                       | 4772     | 7347    | 13951    | 558.7                             | 36.5                                        | 95.0     | 146.2   | 277.6    |
|                      | England | 0.075                            | 0.187    | 0.189   | 0.452    | 517544                | 38976                      | 96724    | 98011   | 233711   | 14540.9                           | 1095.1                                      | 2717.6   | 2753.7  | 6566.3   |
| Violence             | Wales   | 0.037                            | 0.152    | 0.299   | 0.489    | 1703                  | 63                         | 260      | 509     | 832      | 33.9                              | 1.3                                         | 5.2      | 10.1    | 16.6     |
|                      | England | 0.044                            | 0.170    | 0.220   | 0.434    | 29134                 | 1270                       | 4961     | 6404    | 12635    | 818.6                             | 35.7                                        | 139.4    | 179.9   | 355.0    |
| Cancer               | Wales   | 0.002                            | 0.013    | 0.118   | 0.133    | 179919                | 279                        | 2397     | 21263   | 23939    | 3580.2                            | 5.6                                         | 47.7     | 423.1   | 476.4    |
|                      | England | 0.002                            | 0.014    | 0.082   | 0.097    | 2725146               | 4666                       | 38124    | 222605  | 265395   | 76565.7                           | 131.1                                       | 1071.1   | 6254.3  | 7456.5   |
| Type 2 diabetes      | Wales   | 0.026                            | 0.029    | 0.085   | 0.140    | 23306                 | 597                        | 681      | 1982    | 3260     | 463.8                             | 11.9                                        | 13.5     | 39.4    | 64.9     |
|                      | England | 0.028                            | 0.030    | 0.058   | 0.116    | 356871                | 9939                       | 10802    | 20707   | 41448    | 10026.6                           | 279.2                                       | 303.5    | 581.8   | 1164.5   |
| Heart disease        | Wales   | 0.016                            | 0.053    | 0.098   | 0.167    | 77275                 | 1243                       | 4077     | 7556    | 12877    | 1537.7                            | 24.7                                        | 81.1     | 150.4   | 256.2    |
|                      | England | 0.018                            | 0.055    | 0.067   | 0.140    | 1049623               | 18461                      | 57674    | 70352   | 146487   | 29490.2                           | 518.7                                       | 1620.4   | 1976.6  | 4115.7   |
| Stroke               | Wales   | 0.034                            | 0.049    | 0.163   | 0.246    | 39189                 | 1336                       | 1926     | 6372    | 9634     | 779.8                             | 26.6                                        | 38.3     | 126.8   | 191.7    |
|                      | England | 0.038                            | 0.052    | 0.114   | 0.204    | 546308                | 20801                      | 28579    | 62218   | 111597   | 15349.1                           | 584.4                                       | 802.9    | 1748.1  | 3135.4   |
| Respiratory disease  | Wales   | 0.031                            | 0.090    | 0.149   | 0.270    | 50697                 | 1570                       | 4550     | 7545    | 13664    | 1008.8                            | 31.2                                        | 90.5     | 150.1   | 271.9    |
|                      | England | 0.034                            | 0.095    | 0.104   | 0.233    | 784621                | 27000                      | 74559    | 81386   | 182945   | 22044.7                           | 758.6                                       | 2094.8   | 2286.6  | 5140.0   |

ACE, Adverse childhood experience; DALY, Disability adjusted life year. \*Calculated as 1 DALY = GVA per capita (£19,899 Wales, £28,096 England; Balanced, current basic prices, 2017).



1  
2  
3  
4  
5  
6  
7  
8  
9  
10  
11  
12  
13  
14  
15  
16  
17  
18  
19  
20  
21  
22  
23  
24  
25  
26  
27  
28  
29  
30  
31  
32  
33  
34  
35  
36  
37  
38  
39  
40  
41  
42  
43  
44  
45  
46

**Table 3: Total ACE-attributable DALYs and costs and sensitivity analyses**

|                                              | ACE-attributable DALYs (thousands) |       |                 | ACE-attributable costs (£ billion) |       |                 | Equivalent % of GVA |       |                 |
|----------------------------------------------|------------------------------------|-------|-----------------|------------------------------------|-------|-----------------|---------------------|-------|-----------------|
|                                              | England                            | Wales | England & Wales | England                            | Wales | England & Wales | England             | Wales | England & Wales |
| Best estimate                                | 1444.9                             | 110.0 | 1554.9          | 40.6                               | 2.2   | 42.8            | 2.6%                | 3.5%  | 2.6%            |
| Limited to DALYs for 15-69 year olds         | 956.4                              | 69.5  | 1025.8          | 26.9                               | 1.4   | 28.3            | 1.7%                | 2.2%  | 1.7%            |
| PAFs generated using lower CIs for RRs       | 546.7                              | 47.7  | 594.4           | 15.4                               | 0.9   | 16.3            | 1.0%                | 1.5%  | 1.0%            |
| PAFs generated using upper CIs for RRs       | 2314.3                             | 169.0 | 2483.2          | 65.0                               | 3.4   | 68.4            | 4.2%                | 5.4%  | 4.2%            |
| Lower bound (uncertainty interval) for DALYs | 1273.7                             | 96.0  | 1369.8          | 35.8                               | 1.9   | 37.7            | 2.3%                | 3.1%  | 2.3%            |
| Upper bound (uncertainty interval) for DALYs | 1638.6                             | 126.0 | 1764.7          | 46.0                               | 2.5   | 48.5            | 2.9%                | 4.0%  | 3.0%            |

ACE, Adverse childhood experience; DALY, Disability adjusted life year; GVA, gross value added; PAF, population attributable fraction; CI, confidence interval; RR, risk ratio.

For peer review only

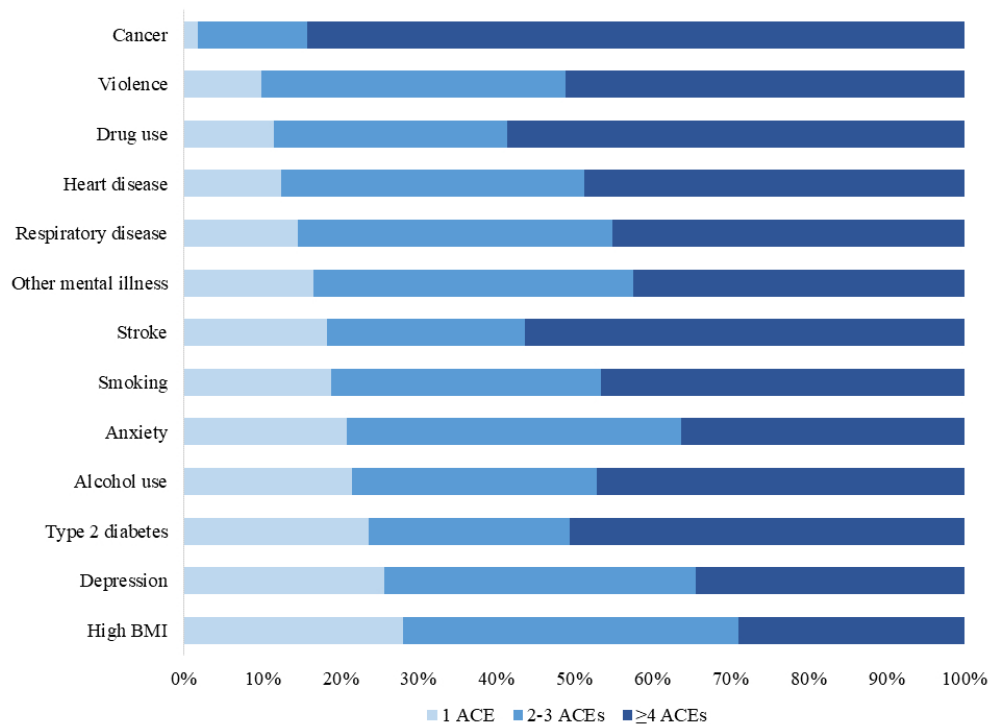

Figure 1: Proportion of ACE-attributable costs for each risk factor and cause of ill-health attributed to 1, 2-3 and ≥4 ACE categories

ACE, adverse childhood experience; BMI, body mass index.

**Supplementary table 1** Study information

| Country | Study location                                             | Stratification for sampling <sup>a</sup>           | Recruitment                                                             | Dates          | Age range (years)  | Total sample <sup>e</sup> (n) | Compliance | Deprivation measure | Reference |
|---------|------------------------------------------------------------|----------------------------------------------------|-------------------------------------------------------------------------|----------------|--------------------|-------------------------------|------------|---------------------|-----------|
| England | Blackburn with Darwen (North West England)                 | Blackburn with Darwen Local Authority <sup>b</sup> | Study information letter sent to randomly selected households;          | 2012 (Aug-Sep) | 18-70 <sup>d</sup> | 1500                          | 70.4%      | IMD 2010            | 1         |
| England | National sample                                            | English Administrative Regions (n=10) <sup>c</sup> | households not opting out upon receipt of letter visited by researchers | 2013 (Apr-Jul) | 18-69              | 4010                          | 53.5%      | IMD 2010            | 2         |
| England | Luton, Hertfordshire Northamptonshire (South East England) | Luton, Hertfordshire Northamptonshire (n=3)        |                                                                         | 2015 (Jun-Sep) | 18-69              | 5623                          | 55.8%      | IMD 2011            | 3         |
| Wales   | National sample                                            | Welsh Health Regions (n=7)                         |                                                                         | 2017 (Mar-Jun) | 18-69              | 2497                          | 58.5%      | WIMD 2014           | 4         |
| Wales   | National sample                                            | Welsh Health Regions (n=7)                         | Households in sampled areas randomly selected by researchers            | 2015 (Feb-May) | 18-69              | 2028                          | 49.1%      | WIMD 2014           | 5         |

<sup>a</sup>Lower Super Output Area level stratification by deprivation quintile. <sup>b</sup>No sub-regional stratification was undertaken in Blackburn with Darwen due to the relatively small size of the sample area. <sup>c</sup>London was split into Inner and Outer London for regional sampling. <sup>d</sup>Individuals aged 70 years were excluded from the sample for consistency. <sup>e</sup>Individuals not completing all questions on variables of interest were excluded. IMD, Index of Multiple Deprivation; WIMD, Welsh Index of Multiple Deprivation.

- Bellis MA, Lowey H, Leckenby N, Hughes K, Harrison D. Adverse childhood experiences: retrospective study to determine their impact on adult health behaviours and health outcomes in a UK population. *J Public Health* 2014;36:81-91.
- Bellis MA, Hughes K, Leckenby N, Hardcastle K, Perkins C, Lowey H. Measuring mortality and the burden of adult disease associated with Adverse Childhood Experiences in England: a national survey. *J Public Health* 2015;37:445-54.
- Ford K, Butler N, Hughes K, Quigg Z, Bellis MA. Adverse childhood experiences in Hertfordshire, Luton and Northamptonshire. Liverpool: Centre for Public Health, Liverpool John Moores University, 2016. [https://www.researchgate.net/publication/302589403\\_Adverse\\_Childhood\\_Experiences\\_ACES\\_in\\_Hertfordshire\\_Luton\\_and\\_Northamptonshire](https://www.researchgate.net/publication/302589403_Adverse_Childhood_Experiences_ACES_in_Hertfordshire_Luton_and_Northamptonshire) (accessed 16 October 2019).
- Hughes K, Ford K, Davies AR, Homolova L, Bellis MA. Sources of resilience and their moderating relationships with harms from adverse childhood experiences. Wrexham: Public Health Wales, 2018. [https://www.researchgate.net/publication/322697404\\_Sources\\_of\\_resilience\\_and\\_their\\_moderating\\_relationships\\_with\\_harms\\_from\\_adverse\\_childhood\\_experiences\\_Report\\_1\\_Mental\\_Illness](https://www.researchgate.net/publication/322697404_Sources_of_resilience_and_their_moderating_relationships_with_harms_from_adverse_childhood_experiences_Report_1_Mental_Illness) (accessed 16 October 2019).
- Bellis MA, Ashton K, Hughes K, Ford K, Bishop J, Paranjothy S. Adverse childhood experiences and their impact on health-harming behaviours in the Welsh population. Cardiff: Public Health Wales, 2016. [https://www.researchgate.net/publication/290433553\\_Adverse\\_Childhood\\_Experiences\\_and\\_their\\_impact\\_on\\_health-harming\\_behaviours\\_in\\_the\\_Welsh\\_adult\\_population](https://www.researchgate.net/publication/290433553_Adverse_Childhood_Experiences_and_their_impact_on_health-harming_behaviours_in_the_Welsh_adult_population) (accessed 16 October 2019).

**Supplementary Table 2** ACE and health outcome questions used

| <b>ACE questions.</b> All ACE questions were preceded by the statement "While you were growing up, before the age of 18..." |                                                                                                                                                                                                                                        |                                                                   |
|-----------------------------------------------------------------------------------------------------------------------------|----------------------------------------------------------------------------------------------------------------------------------------------------------------------------------------------------------------------------------------|-------------------------------------------------------------------|
| <b>ACE</b>                                                                                                                  | <b>Question</b>                                                                                                                                                                                                                        | <b>Qualifying responses</b>                                       |
| <i>Physical abuse</i>                                                                                                       | How often did a parent or adult in your home ever hit, beat, kick, or physically hurt you in any way? This does not include gentle smacking for punishment?                                                                            | Once; more than once                                              |
| <i>Verbal abuse</i>                                                                                                         | How often did a parent or adult in your home ever swear at you, insult you, or put you down?                                                                                                                                           | More than once                                                    |
| <i>Sexual abuse</i>                                                                                                         | How often did anyone at least 5 years older than you (including adults) ever....<br>...touch you sexually?<br>...try to make you touch them sexually?<br>...force you to have any type of sexual intercourse (oral, anal, or vaginal)? | Once or more than once to any of the questions                    |
| <i>Parental separation</i>                                                                                                  | Were your parents ever separated or divorced?                                                                                                                                                                                          | Yes                                                               |
| <i>Domestic violence</i>                                                                                                    | How often did your parents or adults in your home ever slap, hit, kick, punch, or beat each other up?                                                                                                                                  | Once; more than once                                              |
| <i>Mental illness</i>                                                                                                       | Did you live with anyone who was depressed, mentally ill, or suicidal?                                                                                                                                                                 | Yes                                                               |
| <i>Alcohol abuse</i>                                                                                                        | Did you live with anyone who was a problem drinker or alcoholic?                                                                                                                                                                       | Yes                                                               |
| <i>Drug abuse</i>                                                                                                           | Did you live with anyone who used illegal street drugs or who abused prescription medications?                                                                                                                                         | Yes                                                               |
| <i>Incarceration</i>                                                                                                        | Did you live with anyone who served time or was sentenced to serve time in a prison or young offenders' institution?                                                                                                                   | Yes                                                               |
| <b>Health outcome</b>                                                                                                       | <b>Question</b>                                                                                                                                                                                                                        | <b>Qualifying responses</b>                                       |
| <i>Alcohol use</i>                                                                                                          | How often do you have a drink containing alcohol?<br>How many standard drinks containing alcohol do you have on a typical day when you drink?<br>- responses used to estimate daily consumption                                        | Consumption of 12g or more alcohol per day                        |
| <i>Smoking</i>                                                                                                              | In terms of smoking tobacco, which of the following best describes you?                                                                                                                                                                | I smoke daily; I smoke occasionally but not daily                 |
| <i>Drug use</i>                                                                                                             | How often, if ever, have you used heroin or crack cocaine?                                                                                                                                                                             | Used but not in the last 12 months;<br>Used in the past 12 months |
| <i>High BMI</i>                                                                                                             | What is your height? (in feet/inches or metres/centimetres)<br>What is your weight? (in stone/pound, kilograms or pounds)<br>- Responses used to calculate BMI                                                                         | BMI 25.0 or higher                                                |
| <i>Depression</i>                                                                                                           | Are you currently or have you ever been treated for... depression?                                                                                                                                                                     | Yes, currently; Yes, in the past                                  |
| <i>Anxiety</i>                                                                                                              | Are you currently or have you ever been treated for... anxiety?                                                                                                                                                                        | Yes, currently; Yes, in the past                                  |
| <i>Other mental illness</i>                                                                                                 | Are you currently or have you ever been treated for... another mental illness?                                                                                                                                                         | No, never; Yes, currently; Yes, in the past                       |
| <i>Victim of violence</i>                                                                                                   | How many times have you been physically hit in the past 12 months?<br>Or (in Wales, 2017): In the past 12 months, have you been physically hit by someone else?                                                                        | Once; 2 or 3 times; More than 3 times<br>Yes                      |
| <i>Cancer</i>                                                                                                               | Has a doctor or nurse ever told you that you have... Cancer?                                                                                                                                                                           | Yes                                                               |
| <i>Type 2 diabetes</i>                                                                                                      | Has a doctor or nurse ever told you that you have... Type 2 diabetes?                                                                                                                                                                  | Yes                                                               |
| <i>Heart disease</i>                                                                                                        | Has a doctor or nurse ever told you that you have... Coronary heart disease or heart attack?                                                                                                                                           | Yes                                                               |
| <i>Stroke</i>                                                                                                               | Has a doctor or nurse ever told you that you have... Stroke?                                                                                                                                                                           | Yes                                                               |
| <i>Respiratory disease</i>                                                                                                  | Has a doctor or nurse ever told you that you have... Respiratory disease such as Chronic bronchitis/ Emphysema/ Chronic Obstructive Pulmonary Disease?                                                                                 | Yes                                                               |

ACE, adverse childhood experience; BMI, body mass index.

**Supplementary Table 3** Outcomes measured across studies

|                      | All     | England<br>(national) | England<br>(South<br>East) | England<br>(North<br>West) | Wales<br>2015<br>(national) | Wales<br>2017<br>(national) |
|----------------------|---------|-----------------------|----------------------------|----------------------------|-----------------------------|-----------------------------|
| Total sample (n)     | 15285   | 3885                  | 5454                       | 1421                       | 2028                        | 2497                        |
| Alcohol use          | n=12736 |                       |                            |                            |                             |                             |
| Missing (n)          | 52      | 18                    | 7                          | 23                         | 4                           | -                           |
| Yes (%)              | 13.6    | 16.3                  | 10.0                       | 15.3                       | 17.1                        | -                           |
| Smoking              | n=15281 |                       |                            |                            |                             |                             |
| Missing (n)          | 4       | 0                     | 0                          | 4                          | 0                           | 0                           |
| Yes (%)              | 26.3    | 26.9                  | 23.1                       | 37.1                       | 27.9                        | 25.3                        |
| Drug use             | n=15246 |                       |                            |                            |                             |                             |
| Missing (n)          | 39      | 3                     | 19                         | 14                         | 2                           | 1                           |
| Yes (%)              | 2.4     | 2.2                   | 2.0                        | 3.1                        | 4.4                         | 1.6                         |
| High BMI             | n=11527 |                       |                            |                            |                             |                             |
| Missing (n)          | 1261    | 424                   | 481                        | 16                         | 340                         | -                           |
| Yes (%)              | 49.8    | 50.9                  | 49.0                       | 45.7                       | 53.2                        | -                           |
| Depression           | n=2496  |                       |                            |                            |                             |                             |
| Missing (n)          | 1       | -                     | -                          | -                          | -                           | 1                           |
| Yes (%)              | 29.2    | -                     | -                          | -                          | -                           | 29.2                        |
| Anxiety              | n=2493  |                       |                            |                            |                             |                             |
| Missing (n)          | 4       | -                     | -                          | -                          | -                           | 4                           |
| Yes (%)              | 25.0    | -                     | -                          | -                          | -                           | 25.0                        |
| Other mental illness | n=2491  |                       |                            |                            |                             |                             |
| Missing (n)          | 6       | -                     | -                          | -                          | -                           | 6                           |
| Yes (%)              | 6.0     | -                     | -                          | -                          | -                           | 6.0                         |
| Victim of violence   | n=15267 |                       |                            |                            |                             |                             |
| Missing (n)          | 18      | 2                     | 10                         | 2                          | 4                           | 0                           |
| Yes (%)              | 5.1     | 5.3                   | 3.7                        | 6.3                        | 9.1                         | 4.1                         |
| Cancer               | n=12765 |                       |                            |                            |                             |                             |
| Missing (n)          | 23      | 4                     | 12                         | 7                          | 0                           | -                           |
| Yes (%)              | 3.7     | 4.4                   | 2.9                        | 3.2                        | 4.8                         | -                           |
| Type 2 Diabetes      | n=12769 |                       |                            |                            |                             |                             |
| Missing (n)          | 19      | 3                     | 12                         | 4                          | 0                           | -                           |
| Yes (%)              | 5.1     | 4.8                   | 4.7                        | 7.3                        | 5.3                         | -                           |
| Heart disease        | n=12773 |                       |                            |                            |                             |                             |
| Missing (n)          | 15      | 1                     | 12                         | 2                          | 0                           | -                           |
| Yes (%)              | 2.7     | 3.2                   | 2.3                        | 4.2                        | 1.5                         | -                           |
| Stroke               | n=12773 |                       |                            |                            |                             |                             |
| Missing (n)          | 19      | 1                     | 13                         | 5                          | 0                           | -                           |
| Yes (%)              | 1.1     | 1.1                   | 1.0                        | 1.8                        | 0.8                         | -                           |
| Respiratory disease  | n=12766 |                       |                            |                            |                             |                             |
| Missing (n)          | 22      | 0                     | 15                         | 7                          | 0                           | -                           |
| Yes (%)              | 2.8     | 3.5                   | 1.9                        | 5.2                        | 2.1                         | -                           |

- outcome not measured in survey. BMI, body mass index

**Supplementary Table 4: Study outcome and matched Global Burden of Disease (GBD) category**

| <b>Outcome</b>              | <b>GBD category matched (ID)</b>                                                              |
|-----------------------------|-----------------------------------------------------------------------------------------------|
| <b>Risk factors</b>         |                                                                                               |
| Alcohol use                 | Alcohol use (102)                                                                             |
| Smoking                     | Smoking (99)                                                                                  |
| Drug use                    | Drug use (103)                                                                                |
| High BMI                    | High body-mass index (108)                                                                    |
| <b>Causes of ill health</b> |                                                                                               |
| Depression                  | Major depressive disorder (586)                                                               |
| Anxiety                     | Anxiety disorders (571)                                                                       |
| Other mental illness        | Mental disorders (558), excluding major depressive disorder (586) and anxiety disorders (571) |
| Violence                    | Interpersonal violence (724)                                                                  |
| Cancer                      | Neoplasms (410)                                                                               |
| Type 2 diabetes             | Diabetes mellitus type 2 (976)                                                                |
| Heart disease               | Ischaemic heart disease (493), hypertensive heart disease (498)                               |
| Stroke                      | Stroke (494)                                                                                  |
| Respiratory disease         | Chronic respiratory diseases (508), excluding asthma (515)                                    |

ID, identification; BMI, body mass index

peer review only

**Supplementary Table 5** Sample demographics and ACE count prevalence

|                                 | All   | England<br>(national) | England<br>(South East) | England<br>(North West) | Wales 2015<br>(national) | Wales 2017<br>(national) |
|---------------------------------|-------|-----------------------|-------------------------|-------------------------|--------------------------|--------------------------|
| <b>Total sample (n)</b>         | 15285 | 3885                  | 5454                    | 1421                    | 2028                     | 2497                     |
| <b>Gender (%)</b>               |       |                       |                         |                         |                          |                          |
| Male                            | 45.1  | 45.0                  | 44.7                    | 39.9                    | 49.8                     | 45.3                     |
| Female                          | 54.9  | 55.0                  | 55.3                    | 60.1                    | 50.2                     | 54.7                     |
| <b>Age group (%)</b>            |       |                       |                         |                         |                          |                          |
| 18-29                           | 21.9  | 21.0                  | 20.6                    | 24.6                    | 30.4                     | 17.9                     |
| 30-39                           | 19.9  | 19.9                  | 22.5                    | 21.5                    | 14.2                     | 18.4                     |
| 40-49                           | 20.3  | 20.5                  | 20.6                    | 22.2                    | 17.8                     | 20.1                     |
| 50-59                           | 17.7  | 18.0                  | 17.0                    | 14.6                    | 17.5                     | 20.6                     |
| 60-69                           | 20.2  | 20.7                  | 19.3                    | 17.0                    | 20.2                     | 23.1                     |
| <b>Ethnicity (%)</b>            |       |                       |                         |                         |                          |                          |
| White                           | 85.7  | 86.3                  | 80.6                    | 71.3                    | 95.4                     | 96.4                     |
| Other                           | 14.3  | 13.7                  | 19.4                    | 28.7                    | 4.6                      | 3.6                      |
| <b>Deprivation quintile (%)</b> |       |                       |                         |                         |                          |                          |
| (least deprived) 1              | 21.7  | 20.1                  | 28.5                    | 5.5                     | 21.7                     | 18.7                     |
| 2                               | 19.1  | 19.5                  | 20.2                    | 10.2                    | 19.4                     | 20.9                     |
| 3                               | 19.9  | 19.7                  | 20.8                    | 8.1                     | 19.4                     | 25.1                     |
| 4                               | 19.2  | 19.9                  | 20.0                    | 14.5                    | 18.7                     | 19.3                     |
| (most deprived) 5               | 20.1  | 20.7                  | 10.5                    | 61.7                    | 20.7                     | 15.9                     |
| <b>ACE count (%)</b>            |       |                       |                         |                         |                          |                          |
| 0                               | 55.3  | 53.6                  | 58.4                    | 54.4                    | 54.4                     | 52.1                     |
| 1                               | 19.7  | 22.7                  | 18.2                    | 20.0                    | 19.0                     | 18.9                     |
| 2-3                             | 15.3  | 15.4                  | 15.3                    | 15.8                    | 13.0                     | 17.1                     |
| ≥4                              | 9.6   | 8.3                   | 8.1                     | 9.8                     | 13.6                     | 11.9                     |

ACE, Adverse childhood experience.

**Supplementary Table 6** Unadjusted proportion reporting each outcome by ACE count category

|                      | n     | ACE count |       |          |         |
|----------------------|-------|-----------|-------|----------|---------|
|                      |       | 0 ACEs    | 1 ACE | 2-3 ACEs | ≥4 ACEs |
| Alcohol use          | 12736 | 11.3      | 14.6  | 15.9     | 22.0    |
| Smoking              | 15281 | 20.3      | 26.3  | 32.9     | 50.6    |
| Drug use             | 15246 | 0.9       | 1.8   | 3.4      | 10.5    |
| High BMI             | 11527 | 49.3      | 49.8  | 51.1     | 50.6    |
| Depression           | 2496  | 18.4      | 29.4  | 41.3     | 59.1    |
| Anxiety              | 2493  | 16.0      | 24.2  | 36.5     | 49.8    |
| Other mental illness | 2491  | 2.8       | 4.9   | 9.9      | 16.4    |
| Violence             | 15267 | 2.5       | 3.8   | 8.3      | 18.2    |
| Cancer               | 12765 | 3.5       | 3.5   | 3.7      | 5.1     |
| Type 2 diabetes      | 12769 | 5.0       | 5.0   | 5.3      | 5.6     |
| Heart disease        | 12773 | 2.5       | 2.5   | 3.2      | 3.1     |
| Stroke               | 12769 | 0.9       | 1.1   | 1.3      | 1.8     |
| Respiratory disease  | 12766 | 2.2       | 2.7   | 4.0      | 4.7     |

ACE, adverse childhood experience; BMI, body mass index



STROBE Statement—Checklist of items that should be included in reports of *cross-sectional studies*

|                              | Item No                                                                            | Recommendation                                                                                                                                                                                    | Page No           |
|------------------------------|------------------------------------------------------------------------------------|---------------------------------------------------------------------------------------------------------------------------------------------------------------------------------------------------|-------------------|
| <b>Title and abstract</b>    | 1                                                                                  | (a) Indicate the study's design with a commonly used term in the title or the abstract                                                                                                            | 1                 |
|                              |                                                                                    | (b) Provide in the abstract an informative and balanced summary of what was done and what was found                                                                                               | 2                 |
| <b>Introduction</b>          |                                                                                    |                                                                                                                                                                                                   |                   |
| Background/rationale         | 2                                                                                  | Explain the scientific background and rationale for the investigation being reported                                                                                                              | 3                 |
| Objectives                   | 3                                                                                  | State specific objectives, including any prespecified hypotheses                                                                                                                                  | 4                 |
| <b>Methods</b>               |                                                                                    |                                                                                                                                                                                                   |                   |
| Study design                 | 4                                                                                  | Present key elements of study design early in the paper                                                                                                                                           | 4-6               |
| Setting                      | 5                                                                                  | Describe the setting, locations, and relevant dates, including periods of recruitment, exposure, follow-up, and data collection                                                                   | 4, Table S1       |
| Participants                 | 6                                                                                  | (a) Give the eligibility criteria, and the sources and methods of selection of participants                                                                                                       | 4                 |
| Variables                    | 7                                                                                  | Clearly define all outcomes, exposures, predictors, potential confounders, and effect modifiers. Give diagnostic criteria, if applicable                                                          | 5, Table S2       |
| Data sources/<br>measurement | 8*                                                                                 | For each variable of interest, give sources of data and details of methods of assessment (measurement). Describe comparability of assessment methods if there is more than one group              | 5, Tables S2 & S3 |
| Bias                         | 9                                                                                  | Describe any efforts to address potential sources of bias                                                                                                                                         | 6                 |
| Study size                   | 10                                                                                 | Explain how the study size was arrived at                                                                                                                                                         | 4                 |
| Quantitative variables       | 11                                                                                 | Explain how quantitative variables were handled in the analyses. If applicable, describe which groupings were chosen and why                                                                      | 5, 6, Table S2    |
| Statistical methods          | 12                                                                                 | (a) Describe all statistical methods, including those used to control for confounding                                                                                                             | 5,6               |
|                              |                                                                                    | (b) Describe any methods used to examine subgroups and interactions                                                                                                                               | 5,6               |
|                              | (c) Explain how missing data were addressed                                        | Table S3                                                                                                                                                                                          |                   |
|                              | (d) If applicable, describe analytical methods taking account of sampling strategy | 5                                                                                                                                                                                                 |                   |
|                              | (e) Describe any sensitivity analyses                                              | 6                                                                                                                                                                                                 |                   |
| <b>Results</b>               |                                                                                    |                                                                                                                                                                                                   |                   |
| Participants                 | 13*                                                                                | (a) Report numbers of individuals at each stage of study—eg numbers potentially eligible, examined for eligibility, confirmed eligible, included in the study, completing follow-up, and analysed | 4, Table S1       |
|                              |                                                                                    | (b) Give reasons for non-participation at each stage                                                                                                                                              | NA                |
|                              |                                                                                    | (c) Consider use of a flow diagram                                                                                                                                                                | NA                |
| Descriptive data             | 14*                                                                                | (a) Give characteristics of study participants (eg demographic, clinical, social) and information on exposures and potential confounders                                                          | Table S5          |
|                              |                                                                                    | (b) Indicate number of participants with missing data for each variable of interest                                                                                                               | Table S3          |
| Outcome data                 | 15*                                                                                | Report numbers of outcome events or summary measures                                                                                                                                              | Table S3          |

|                                                       |                          |    |                                                                                                                                                                                                              |                      |
|-------------------------------------------------------|--------------------------|----|--------------------------------------------------------------------------------------------------------------------------------------------------------------------------------------------------------------|----------------------|
| 1<br>2<br>3<br>4<br>5<br>6<br>7<br>8<br>9<br>10<br>11 | Main results             | 16 | (a) Give unadjusted estimates and, if applicable, confounder-adjusted estimates and their precision (eg, 95% confidence interval). Make clear which confounders were adjusted for and why they were included | 5, Table S6, Table 1 |
| 12                                                    |                          |    | (b) Report category boundaries when continuous variables were categorized                                                                                                                                    | NA                   |
| 13                                                    |                          |    | (c) If relevant, consider translating estimates of relative risk into absolute risk for a meaningful time period                                                                                             | 7, Table 2           |
| 14                                                    | Other analyses           | 17 | Report other analyses done—eg analyses of subgroups and interactions, and sensitivity analyses                                                                                                               | 8, Table 3           |
| 15                                                    | <b>Discussion</b>        |    |                                                                                                                                                                                                              |                      |
| 16                                                    | Key results              | 18 | Summarise key results with reference to study objectives                                                                                                                                                     | 8                    |
| 17                                                    | Limitations              | 19 | Discuss limitations of the study, taking into account sources of potential bias or imprecision. Discuss both direction and magnitude of any potential bias                                                   | 9                    |
| 18                                                    | Interpretation           | 20 | Give a cautious overall interpretation of results considering objectives, limitations, multiplicity of analyses, results from similar studies, and other relevant evidence                                   | 8-10                 |
| 19                                                    | Generalisability         | 21 | Discuss the generalisability (external validity) of the study results                                                                                                                                        | 9                    |
| 20                                                    | <b>Other information</b> |    |                                                                                                                                                                                                              |                      |
| 21                                                    | Funding                  | 22 | Give the source of funding and the role of the funders for the present study and, if applicable, for the original study on which the present article is based                                                | 12                   |

\*Give information separately for exposed and unexposed groups.

**Note:** An Explanation and Elaboration article discusses each checklist item and gives methodological background and published examples of transparent reporting. The STROBE checklist is best used in conjunction with this article (freely available on the Web sites of PLoS Medicine at <http://www.plosmedicine.org/>, Annals of Internal Medicine at <http://www.annals.org/>, and Epidemiology at <http://www.epidem.com/>). Information on the STROBE Initiative is available at [www.strobe-statement.org](http://www.strobe-statement.org).
