# Supplementary material for: Health and financial burden of adverse childhood experiences in England and Wales: a combined primary data study of five surveys
Source: PubMed Central journal article supplement — BMJ Open. 2020 Jun 7;10(6):e036374. doi: 10.1136/bmjopen-2019-036374 (PMC7282338; doi:10.1136/bmjopen-2019-036374), 2020-06-07
Supplement: bmjopen-2019-036374supp001.pdf [file bmjopen-2019-036374supp001.pdf]

**Supplementary table 1** Study information

| Country | Study location                                             | Stratification for sampling <sup>a</sup>           | Recruitment                                                                                                                            | Dates          | Age range (years)  | Total sample <sup>e</sup> (n) | Compliance | Deprivation measure | Reference |
|---------|------------------------------------------------------------|----------------------------------------------------|----------------------------------------------------------------------------------------------------------------------------------------|----------------|--------------------|-------------------------------|------------|---------------------|-----------|
| England | Blackburn with Darwen (North West England)                 | Blackburn with Darwen Local Authority <sup>b</sup> | Study information letter sent to randomly selected households; households not opting out upon receipt of letter visited by researchers | 2012 (Aug-Sep) | 18-70 <sup>d</sup> | 1500                          | 70.4%      | IMD 2010            | 1         |
| England | National sample                                            | English Administrative Regions (n=10) <sup>c</sup> |                                                                                                                                        | 2013 (Apr-Jul) | 18-69              | 4010                          | 53.5%      | IMD 2010            | 2         |
| England | Luton, Hertfordshire Northamptonshire (South East England) | Luton, Hertfordshire Northamptonshire (n=3)        |                                                                                                                                        | 2015 (Jun-Sep) | 18-69              | 5623                          | 55.8%      | IMD 2011            | 3         |
| Wales   | National sample                                            | Welsh Health Regions (n=7)                         |                                                                                                                                        | 2017 (Mar-Jun) | 18-69              | 2497                          | 58.5%      | WIMD 2014           | 4         |
| Wales   | National sample                                            | Welsh Health Regions (n=7)                         | Households in sampled areas randomly selected by researchers                                                                           | 2015 (Feb-May) | 18-69              | 2028                          | 49.1%      | WIMD 2014           | 5         |

<sup>a</sup>Lower Super Output Area level stratification by deprivation quintile. <sup>b</sup>No sub-regional stratification was undertaken in Blackburn with Darwen due to the relatively small size of the sample area. <sup>c</sup>London was split into Inner and Outer London for regional sampling. <sup>d</sup>Individuals aged 70 years were excluded from the sample for consistency. <sup>e</sup>Individuals not completing all questions on variables of interest were excluded. IMD, Index of Multiple Deprivation; WIMD, Welsh Index of Multiple Deprivation.

1. Bellis MA, Lowey H, Leckenby N, Hughes K, Harrison D. Adverse childhood experiences: retrospective study to determine their impact on adult health behaviours and health outcomes in a UK population. *J Public Health* 2014;36:81-91.
2. Bellis MA, Hughes K, Leckenby N, Hardcastle K, Perkins C, Lowey H. Measuring mortality and the burden of adult disease associated with Adverse Childhood Experiences in England: a national survey. *J Public Health* 2015;37:445-54.
3. Ford K, Butler N, Hughes K, Quigg Z, Bellis MA. Adverse childhood experiences in Hertfordshire, Luton and Northamptonshire. Liverpool: Centre for Public Health, Liverpool John Moores University, 2016. [https://www.researchgate.net/publication/302589403\\_Adverse\\_Childhood\\_Experiences\\_ACEs\\_in\\_Hertfordshire\\_Luton\\_and\\_Northamptonshire](https://www.researchgate.net/publication/302589403_Adverse_Childhood_Experiences_ACEs_in_Hertfordshire_Luton_and_Northamptonshire) (accessed 16 October 2019).
4. Hughes K, Ford K, Davies AR, Homolova L, Bellis MA. Sources of resilience and their moderating relationships with harms from adverse childhood experiences. Wrexham: Public Health Wales, 2018. [https://www.researchgate.net/publication/322697404\\_Sources\\_of\\_resilience\\_and\\_their\\_moderating\\_relationships\\_with\\_harms\\_from\\_adverse\\_childhood\\_experiences\\_Report\\_1\\_Mental\\_Illness](https://www.researchgate.net/publication/322697404_Sources_of_resilience_and_their_moderating_relationships_with_harms_from_adverse_childhood_experiences_Report_1_Mental_Illness) (accessed 16 October 2019).
5. Bellis MA, Ashton K, Hughes K, Ford K, Bishop J, Paranjothy S. Adverse childhood experiences and their impact on health-harming behaviours in the Welsh population. Cardiff: Public Health Wales, 2016. [https://www.researchgate.net/publication/290433553\\_Adverse\\_Childhood\\_Experiences\\_and\\_their\\_impact\\_on\\_health-harming\\_behaviours\\_in\\_the\\_Welsh\\_adult\\_population](https://www.researchgate.net/publication/290433553_Adverse_Childhood_Experiences_and_their_impact_on_health-harming_behaviours_in_the_Welsh_adult_population) (accessed 16 October 2019).

**Supplementary Table 2** ACE and health outcome questions used

| <b>ACE questions.</b> All ACE questions were preceded by the statement “While you were growing up, before the age of 18...” |                                                                                                                                                                                                                                       |                                                                   |
|-----------------------------------------------------------------------------------------------------------------------------|---------------------------------------------------------------------------------------------------------------------------------------------------------------------------------------------------------------------------------------|-------------------------------------------------------------------|
| <b>ACE</b>                                                                                                                  | <b>Question</b>                                                                                                                                                                                                                       | <b>Qualifying responses</b>                                       |
| <i>Physical abuse</i>                                                                                                       | How often did a parent or adult in your home ever hit, beat, kick, or physically hurt you in any way? This does not include gentle smacking for punishment?                                                                           | Once; more than once                                              |
| <i>Verbal abuse</i>                                                                                                         | How often did a parent or adult in your home ever swear at you, insult you, or put you down?                                                                                                                                          | More than once                                                    |
| <i>Sexual abuse</i>                                                                                                         | How often did anyone at least 5 years older than you (including adults) ever...<br>...touch you sexually?<br>...try to make you touch them sexually?<br>...force you to have any type of sexual intercourse (oral, anal, or vaginal)? | Once or more than once to any of the questions                    |
| <i>Parental separation</i>                                                                                                  | Were your parents ever separated or divorced?                                                                                                                                                                                         | Yes                                                               |
| <i>Domestic violence</i>                                                                                                    | How often did your parents or adults in your home ever slap, hit, kick, punch, or beat each other up?                                                                                                                                 | Once; more than once                                              |
| <i>Mental illness</i>                                                                                                       | Did you live with anyone who was depressed, mentally ill, or suicidal?                                                                                                                                                                | Yes                                                               |
| <i>Alcohol abuse</i>                                                                                                        | Did you live with anyone who was a problem drinker or alcoholic?                                                                                                                                                                      | Yes                                                               |
| <i>Drug abuse</i>                                                                                                           | Did you live with anyone who used illegal street drugs or who abused prescription medications?                                                                                                                                        | Yes                                                               |
| <i>Incarceration</i>                                                                                                        | Did you live with anyone who served time or was sentenced to serve time in a prison or young offenders' institution?                                                                                                                  | Yes                                                               |
| <b>Health outcome</b>                                                                                                       | <b>Question</b>                                                                                                                                                                                                                       | <b>Qualifying responses</b>                                       |
| <i>Alcohol use</i>                                                                                                          | How often do you have a drink containing alcohol?<br>How many standard drinks containing alcohol do you have on a typical day when you drink?<br>- responses used to estimate daily consumption                                       | Consumption of 12g or more alcohol per day                        |
| <i>Smoking</i>                                                                                                              | In terms of smoking tobacco, which of the following best describes you?                                                                                                                                                               | I smoke daily; I smoke occasionally but not daily                 |
| <i>Drug use</i>                                                                                                             | How often, if ever, have you used heroin or crack cocaine?                                                                                                                                                                            | Used but not in the last 12 months;<br>Used in the past 12 months |
| <i>High BMI</i>                                                                                                             | What is your height? (in feet/inches or metres/centimetres)<br>What is your weight? (in stone/pound, kilograms or pounds)<br>- Responses used to calculate BMI                                                                        | BMI 25.0 or higher                                                |
| <i>Depression</i>                                                                                                           | Are you currently or have you ever been treated for... depression?                                                                                                                                                                    | Yes, currently; Yes, in the past                                  |
| <i>Anxiety</i>                                                                                                              | Are you currently or have you ever been treated for... anxiety?                                                                                                                                                                       | Yes, currently; Yes, in the past                                  |
| <i>Other mental illness</i>                                                                                                 | Are you currently or have you ever been treated for... another mental illness?                                                                                                                                                        | No, never; Yes, currently; Yes, in the past                       |
| <i>Victim of violence</i>                                                                                                   | How many times have you been physically hit in the past 12 months?<br>Or (in Wales, 2017): In the past 12 months, have you been physically hit by someone else?                                                                       | Once; 2 or 3 times; More than 3 times<br>Yes                      |
| <i>Cancer</i>                                                                                                               | Has a doctor or nurse ever told you that you have... Cancer?                                                                                                                                                                          | Yes                                                               |
| <i>Type 2 diabetes</i>                                                                                                      | Has a doctor or nurse ever told you that you have... Type 2 diabetes?                                                                                                                                                                 | Yes                                                               |
| <i>Heart disease</i>                                                                                                        | Has a doctor or nurse ever told you that you have... Coronary heart disease or heart attack?                                                                                                                                          | Yes                                                               |
| <i>Stroke</i>                                                                                                               | Has a doctor or nurse ever told you that you have... Stroke?                                                                                                                                                                          | Yes                                                               |
| <i>Respiratory disease</i>                                                                                                  | Has a doctor or nurse ever told you that you have... Respiratory disease such as Chronic bronchitis/ Emphysema/ Chronic Obstructive Pulmonary Disease?                                                                                | Yes                                                               |

ACE, adverse childhood experience; BMI, body mass index.

**Supplementary Table 3** Outcomes measured across studies

|                      | All     | England<br>(national) | England<br>(South<br>East) | England<br>(North<br>West) | Wales<br>2015<br>(national) | Wales<br>2017<br>(national) |
|----------------------|---------|-----------------------|----------------------------|----------------------------|-----------------------------|-----------------------------|
| Total sample (n)     | 15285   | 3885                  | 5454                       | 1421                       | 2028                        | 2497                        |
| Alcohol use          | n=12736 |                       |                            |                            |                             |                             |
| Missing (n)          | 52      | 18                    | 7                          | 23                         | 4                           | -                           |
| Yes (%)              | 13.6    | 16.3                  | 10.0                       | 15.3                       | 17.1                        | -                           |
| Smoking              | n=15281 |                       |                            |                            |                             |                             |
| Missing (n)          | 4       | 0                     | 0                          | 4                          | 0                           | 0                           |
| Yes (%)              | 26.3    | 26.9                  | 23.1                       | 37.1                       | 27.9                        | 25.3                        |
| Drug use             | n=15246 |                       |                            |                            |                             |                             |
| Missing (n)          | 39      | 3                     | 19                         | 14                         | 2                           | 1                           |
| Yes (%)              | 2.4     | 2.2                   | 2.0                        | 3.1                        | 4.4                         | 1.6                         |
| High BMI             | n=11527 |                       |                            |                            |                             |                             |
| Missing (n)          | 1261    | 424                   | 481                        | 16                         | 340                         | -                           |
| Yes (%)              | 49.8    | 50.9                  | 49.0                       | 45.7                       | 53.2                        | -                           |
| Depression           | n=2496  |                       |                            |                            |                             |                             |
| Missing (n)          | 1       | -                     | -                          | -                          | -                           | 1                           |
| Yes (%)              | 29.2    | -                     | -                          | -                          | -                           | 29.2                        |
| Anxiety              | n=2493  |                       |                            |                            |                             |                             |
| Missing (n)          | 4       | -                     | -                          | -                          | -                           | 4                           |
| Yes (%)              | 25.0    | -                     | -                          | -                          | -                           | 25.0                        |
| Other mental illness | n=2491  |                       |                            |                            |                             |                             |
| Missing (n)          | 6       | -                     | -                          | -                          | -                           | 6                           |
| Yes (%)              | 6.0     | -                     | -                          | -                          | -                           | 6.0                         |
| Victim of violence   | n=15267 |                       |                            |                            |                             |                             |
| Missing (n)          | 18      | 2                     | 10                         | 2                          | 4                           | 0                           |
| Yes (%)              | 5.1     | 5.3                   | 3.7                        | 6.3                        | 9.1                         | 4.1                         |
| Cancer               | n=12765 |                       |                            |                            |                             |                             |
| Missing (n)          | 23      | 4                     | 12                         | 7                          | 0                           | -                           |
| Yes (%)              | 3.7     | 4.4                   | 2.9                        | 3.2                        | 4.8                         | -                           |
| Type 2 Diabetes      | n=12769 |                       |                            |                            |                             |                             |
| Missing (n)          | 19      | 3                     | 12                         | 4                          | 0                           | -                           |
| Yes (%)              | 5.1     | 4.8                   | 4.7                        | 7.3                        | 5.3                         | -                           |
| Heart disease        | n=12773 |                       |                            |                            |                             |                             |
| Missing (n)          | 15      | 1                     | 12                         | 2                          | 0                           | -                           |
| Yes (%)              | 2.7     | 3.2                   | 2.3                        | 4.2                        | 1.5                         | -                           |
| Stroke               | n=12773 |                       |                            |                            |                             |                             |
| Missing (n)          | 19      | 1                     | 13                         | 5                          | 0                           | -                           |
| Yes (%)              | 1.1     | 1.1                   | 1.0                        | 1.8                        | 0.8                         | -                           |
| Respiratory disease  | n=12766 |                       |                            |                            |                             |                             |
| Missing (n)          | 22      | 0                     | 15                         | 7                          | 0                           | -                           |
| Yes (%)              | 2.8     | 3.5                   | 1.9                        | 5.2                        | 2.1                         | -                           |

- outcome not measured in survey. BMI, body mass index

**Supplementary Table 4: Study outcome and matched Global Burden of Disease (GBD) category**

| <b>Outcome</b>              | <b>GBD category matched (ID)</b>                                                              |
|-----------------------------|-----------------------------------------------------------------------------------------------|
| <b>Risk factors</b>         |                                                                                               |
| Alcohol use                 | Alcohol use (102)                                                                             |
| Smoking                     | Smoking (99)                                                                                  |
| Drug use                    | Drug use (103)                                                                                |
| High BMI                    | High body-mass index (108)                                                                    |
| <b>Causes of ill health</b> |                                                                                               |
| Depression                  | Major depressive disorder (586)                                                               |
| Anxiety                     | Anxiety disorders (571)                                                                       |
| Other mental illness        | Mental disorders (558), excluding major depressive disorder (586) and anxiety disorders (571) |
| Violence                    | Interpersonal violence (724)                                                                  |
| Cancer                      | Neoplasms (410)                                                                               |
| Type 2 diabetes             | Diabetes mellitus type 2 (976)                                                                |
| Heart disease               | Ischaemic heart disease (493), hypertensive heart disease (498)                               |
| Stroke                      | Stroke (494)                                                                                  |
| Respiratory disease         | Chronic respiratory diseases (508), excluding asthma (515)                                    |

ID, identification; BMI, body mass index

**Supplementary Table 5** Sample demographics and ACE count prevalence

|                                 | All   | England<br>(national) | England<br>(South East) | England<br>(North West) | Wales 2015<br>(national) | Wales 2017<br>(national) |
|---------------------------------|-------|-----------------------|-------------------------|-------------------------|--------------------------|--------------------------|
| <b>Total sample (n)</b>         | 15285 | 3885                  | 5454                    | 1421                    | 2028                     | 2497                     |
| <b>Gender (%)</b>               |       |                       |                         |                         |                          |                          |
| Male                            | 45.1  | 45.0                  | 44.7                    | 39.9                    | 49.8                     | 45.3                     |
| Female                          | 54.9  | 55.0                  | 55.3                    | 60.1                    | 50.2                     | 54.7                     |
| <b>Age group (%)</b>            |       |                       |                         |                         |                          |                          |
| 18-29                           | 21.9  | 21.0                  | 20.6                    | 24.6                    | 30.4                     | 17.9                     |
| 30-39                           | 19.9  | 19.9                  | 22.5                    | 21.5                    | 14.2                     | 18.4                     |
| 40-49                           | 20.3  | 20.5                  | 20.6                    | 22.2                    | 17.8                     | 20.1                     |
| 50-59                           | 17.7  | 18.0                  | 17.0                    | 14.6                    | 17.5                     | 20.6                     |
| 60-69                           | 20.2  | 20.7                  | 19.3                    | 17.0                    | 20.2                     | 23.1                     |
| <b>Ethnicity (%)</b>            |       |                       |                         |                         |                          |                          |
| White                           | 85.7  | 86.3                  | 80.6                    | 71.3                    | 95.4                     | 96.4                     |
| Other                           | 14.3  | 13.7                  | 19.4                    | 28.7                    | 4.6                      | 3.6                      |
| <b>Deprivation quintile (%)</b> |       |                       |                         |                         |                          |                          |
| (least deprived) 1              | 21.7  | 20.1                  | 28.5                    | 5.5                     | 21.7                     | 18.7                     |
| 2                               | 19.1  | 19.5                  | 20.2                    | 10.2                    | 19.4                     | 20.9                     |
| 3                               | 19.9  | 19.7                  | 20.8                    | 8.1                     | 19.4                     | 25.1                     |
| 4                               | 19.2  | 19.9                  | 20.0                    | 14.5                    | 18.7                     | 19.3                     |
| (most deprived) 5               | 20.1  | 20.7                  | 10.5                    | 61.7                    | 20.7                     | 15.9                     |
| <b>ACE count (%)</b>            |       |                       |                         |                         |                          |                          |
| 0                               | 55.3  | 53.6                  | 58.4                    | 54.4                    | 54.4                     | 52.1                     |
| 1                               | 19.7  | 22.7                  | 18.2                    | 20.0                    | 19.0                     | 18.9                     |
| 2-3                             | 15.3  | 15.4                  | 15.3                    | 15.8                    | 13.0                     | 17.1                     |
| ≥4                              | 9.6   | 8.3                   | 8.1                     | 9.8                     | 13.6                     | 11.9                     |

ACE, Adverse childhood experience.

**Supplementary Table 6** Unadjusted proportion reporting each outcome by ACE count category

|                      | n     | ACE count |       |          |         |
|----------------------|-------|-----------|-------|----------|---------|
|                      |       | 0 ACEs    | 1 ACE | 2-3 ACEs | ≥4 ACEs |
| Alcohol use          | 12736 | 11.3      | 14.6  | 15.9     | 22.0    |
| Smoking              | 15281 | 20.3      | 26.3  | 32.9     | 50.6    |
| Drug use             | 15246 | 0.9       | 1.8   | 3.4      | 10.5    |
| High BMI             | 11527 | 49.3      | 49.8  | 51.1     | 50.6    |
| Depression           | 2496  | 18.4      | 29.4  | 41.3     | 59.1    |
| Anxiety              | 2493  | 16.0      | 24.2  | 36.5     | 49.8    |
| Other mental illness | 2491  | 2.8       | 4.9   | 9.9      | 16.4    |
| Violence             | 15267 | 2.5       | 3.8   | 8.3      | 18.2    |
| Cancer               | 12765 | 3.5       | 3.5   | 3.7      | 5.1     |
| Type 2 diabetes      | 12769 | 5.0       | 5.0   | 5.3      | 5.6     |
| Heart disease        | 12773 | 2.5       | 2.5   | 3.2      | 3.1     |
| Stroke               | 12769 | 0.9       | 1.1   | 1.3      | 1.8     |
| Respiratory disease  | 12766 | 2.2       | 2.7   | 4.0      | 4.7     |

ACE, adverse childhood experience; BMI, body mass index
